# ***Autistic traits, resting-state connectivity and absolute pitch in professional musicians: shared and distinct neural features***

Wenhart, T.<sup>1,2</sup>, Bethlehem, R.A.I.<sup>3</sup>, Baron-Cohen, S.<sup>3</sup>, Altenmüller, E.<sup>1,2\*</sup>

<sup>1</sup> Institute of Music Physiology and Musicians' Medicine, University for Music, Drama and Media, Hannover, Germany

<sup>2</sup> Center for Systems Neuroscience, Hannover, Germany

<sup>3</sup> Autism Research Center, Department of Psychiatry, University of Cambridge, United Kingdom

\* corresponding author: [eckart.altenmueller@hmtm-hannover.de](mailto:eckart.altenmueller@hmtm-hannover.de)

## 1 **Abstract**

## 2 **Background**

3 Recent studies indicate increased autistic traits in musicians with absolute pitch and a higher  
4 incidence of absolute pitch in people with autism. Theoretical accounts connect both of these with  
5 shared neural principles of local hyper- and global hypoconnectivity, enhanced perceptual  
6 functioning and a detail-focused cognitive style. This is the first study to investigate absolute pitch  
7 proficiency, autistic traits and brain correlates in the same study.

## 8 **Sample and Methods**

9 Graph theoretical analysis was conducted on resting state (eyes closed and eyes open) EEG  
10 connectivity (wPLI, weighted Phase Lag Index) matrices obtained from 31 absolute pitch (AP) and  
11 33 relative pitch (RP) professional musicians. Small Worldness, Global Clustering Coefficient and  
12 Average Path length were related to autistic traits, passive (tone identification) and active (pitch  
13 adjustment) absolute pitch proficiency and onset of musical training using Welch-two-sample-tests,  
14 correlations and general linear models.

## 15 **Results**

16 Analyses revealed increased Path length (delta 2-4 Hz), reduced Clustering (beta 13-18 Hz),  
17 reduced Small-Worldness (gamma 30-60 Hz) and increased autistic traits for AP compared to RP.  
18 Only Clustering values (beta 13-18 Hz) were predicted by both AP proficiency and autistic traits.  
19 Post-hoc single connection permutation tests among raw wPLI matrices in the beta band (13-18 Hz)  
20 revealed widely reduced interhemispheric connectivity between bilateral auditory related electrode  
21 positions along with higher connectivity between F7-F8 and F8-P9 for AP. Pitch naming ability and  
22 Pitch adjustment ability were predicted by Path length, Clustering, autistic traits and onset of  
23 musical training (for pitch adjustment) explaining 44% respectively 38% of variance.

## 24 **Conclusions**

25 Results show both shared and distinct neural features between AP and autistic traits. Differences in  
26 the beta range were associated with higher autistic traits in the same population. In general, AP

27 musicians exhibit a widely underconnected brain with reduced functional integration and reduced  
28 small-world-property during resting state. This might be partly related to autism-specific brain  
29 connectivity, while differences in Path length and Small-Worldness reflect other ability-specific  
30 influences. This is further evidence for different pathways in the acquisition and development of  
31 absolute pitch, likely influenced by both genetic and environmental factors and their interaction.

32

33 **Keywords:**

34 *absolute pitch, autistic traits, brain networks, graph theory, musicians, electroencephalography*

35

36 **Background**

37

38 Autism spectrum disorders or conditions (henceforth ‘autism’) are more common in people with  
39 mathematical [1], visuo-spatial [2], musical [3] or ‘savant’ abilities [4], e.g. rapid mental  
40 mathematical calculation [5, 6], calendar calculation [7], or extreme memory [8, 9]. Autism, a set of  
41 neurodevelopmental condition, are characterized by social and communication difficulties,  
42 alongside unusually repetitive behaviors and unusually narrow interests [10], sensory  
43 hypersensitivity, and difficulties in adjusting to unexpected change (DSM-5, APA 2013).

44

45 Absolute pitch (AP), the ability to name or produce a musical tone without the use of a reference  
46 tone [11] is a common special ability in professional musicians with an incidence of up to 7-25%  
47 [12–14] but less than 1% [15] in the general population. AP is an excellent model for the  
48 investigation of a joint influence of genetic and environmental factors on the brain and on human  
49 cognitive abilities [16]. An influence of age of onset of musical training [17–19], ethnicity [12, 14,  
50 19], and type of musical education (label to fixed pitch vs. label to interval, unfixed to pitch)  
51 techniques [12]) suggest environmental aspects in the acquisition of AP. In contrast, AP often  
52 clusters in families, genetically overlaps with other familial aggregated abilities (e.g. synesthesia  
53 [20]) and has a higher incidence in autistic people [3, 7, 21–25] and in Williams-syndrome [26],

54 both strongly genetic conditions [27–34]. Finally, a sensitive or critical period before the age of  
55 seven is considered due to the importance of early onset of musical training [14, 16, 17, 35–38]  
56 Recently, two studies have given evidence for heightened autistic traits in musicians with AP [39,  
57 40]. Both AP and autism are associated with similarly altered brain connectivity in terms of the  
58 relation between hyper- and hypo-connectivity [36, 41–50]. The theory of veridical mapping [7]  
59 tries to explain absolute pitch, synesthesia and other abilities like hyperlexia, frequently seen in  
60 autistic people or in savant syndrome, with the neurocognitive mechanism of associating  
61 homologous structures of two perceptual or cognitive structures (veridical mapping). According to  
62 this framework, enhanced low level perception [51, 52] and an increased ability to detect patterns  
63 (‘systemizing’ [53]) is associated with regional hyper- as well as global hypo-connectivity in  
64 absolute pitch [41, 43, 54–59] and autism [42, 44, 46, 60]. It is also noteworthy that autism and  
65 abilities like absolute pitch share excellent attention to detail [35, 61] and a shift in the direction of  
66 higher segregation with reduced integration in the brain [61]. Investigating disconnection  
67 syndromes or integration deficit disorders, as well as phenomena with similar brain network  
68 characteristics, may therefore provide insights into the variability of brain network structure and  
69 function and its relation to perception, cognition and behaviour.

70

71 The present study tests if and to what extent AP and autistic traits share the same  
72 neurophysiological network connectivity. To our knowledge, this study is the first to investigate (1)  
73 the relation of pitch adjustment ability (active absolute pitch; in contrast to (passive) pitch  
74 identification) and brain as well as behavioral correlates, (2) the relation of AP ability, autistic traits  
75 and functional brain connectivity within one study, and (3) graph theoretical network parameters in  
76 AP during resting state electroencephalography. We use graph theoretical analysis [62, 63] of  
77 resting state EEG data to estimate differences in global network structure of the brain. We analyzed  
78 three graph theoretical network parameters reflecting segregation (Average Clustering Coefficient)  
79 and integration (Average Shortest Path Length) and so called Small-Worldness (a combination of

80 Clustering and Path length) [62, 63]. To our knowledge this is also the first study investigating  
81 global i.e. average connectivity parameters over the whole brain between AP and RP (relative pitch)  
82 musicians, while prior studies [41, 43] have focused on parameters for single regions (e.g. degree,  
83 single node clustering, and single node characteristic path length). We expected higher autistic  
84 traits, higher Path length (reduced integration) and lower Clustering (underconnectivity) for AP and  
85 an interrelation among those variables. Further, we expected these differences to specifically occur  
86 in low (delta, theta) vs. high frequency (beta) ranges for integration vs. segregation, respectively.

87

## 88 **Methods**

### 89 *Participants*

90 Thirty-one AP musicians (16 female) and 33 RP musicians (15 female) participated in the study.  
91 One male RP participants had to be excluded from EEG analysis because of missing EEG-data.  
92 Participants were recruited via an online survey using UNIPARK software  
93 (<https://www.unipark.com/>) and primarily were students or professional musicians at the University  
94 for Music, Drama and Media, Hanover. Four AP and two RP were amateur musicians. An online  
95 pitch identification screening (PIS) consisting of 36 categorical, equal-tempered sine waves in the  
96 range of three octaves between C4 (261.63 Hz) and B6 (1975.5 Hz) was used to allocate the  
97 participants to the groups (AP: >12/36 tones named correctly, else RP). Four AP were non-native  
98 German speakers and had the choice between a German and an English version of the experiments.  
99 One AP reported taking Mirtazapine. None of the participants reported any history of severe  
100 psychiatric or neurological conditions. The AP group consisted of 15 pianists, 9 string players, 3  
101 woodwind instruments, two singers and 2 brass players; the RP group consisted of 13 pianists, 4  
102 string players, 6 woodwind instruments, 3 bassists/guitarists/accordionists, 3 singers, one drummer  
103 and 3 brass players. Handedness was assessed by Edinburgh Handedness Inventory [64]; one AP  
104 was left handed, all other AP were consistently right handed, three RP were left-handed, two RP

105 were ambidextrous. This study was approved by the local Ethics Committee at the Medical  
 106 University Hannover. All participants gave written consent.

107

### 108 *Setting*

109 The study was divided into three parts: the online survey and two appointments in the lab at the  
 110 Institute for Music Physiology and Musicians Medicine of the University for Music, Drama and  
 111 Media, Hannover. While the online survey was used for the pitch identification screening and  
 112 diagnostic as well as demographic questionnaires (see below), general intelligence, musical ability,  
 113 pitch adjustment ability and resting state EEG were assessed in the lab (see Table 1). Four further  
 114 experiments were conducted within the same two sessions at the lab and are reported elsewhere.  
 115 Raven’s Standard Progressive Matrices [65] and “Zahlenverbindungstest“ (ZVT, [66]) were used to  
 116 assess general nonverbal intelligence and information processing speed, respectively. Musical  
 117 ability and musical experience were controlled for with the use of AMMA (Advanced Measures of  
 118 Music Audiation, [67]), Musical-Sophistication Index (GOLD-MSI, [68]) and estimated total hours  
 119 of musical training within life span (house intern online questionnaire).

120

**Table 1 Participants’ characteristics**

|                       | AP (n=31) |       |              | RP (n=33) |          |               | t-test                                           |
|-----------------------|-----------|-------|--------------|-----------|----------|---------------|--------------------------------------------------|
|                       | Mean      | SD    | Range        | Mean      | SD       | Range         |                                                  |
| age                   | 25.13     | 9.2   | 17-58        | 24.0      | 7.02     | 17-57         | t(56.1)= -0.549;<br>p = 0.585                    |
| SPM-IQ                | 110.4     | 16.4  | 73-132.25    | 114.41    | 13.14    | 86.5-134.5    | t(57.5)= 1.073;<br>p = 0.288                     |
| ZVT-IQ                | 120.76    | 13.14 | 101.5-145    | 120.61    | 13.69    | 97-143.5      | t(61.9)= -0.045;<br>p = 0.964                    |
| hours main instrument | 11961.4   | 9212  | 1642.5-39785 | 13735.61  | 17125.89 | 1606-77617.25 | t(49.7)= 0.520;<br>p = 0.605                     |
| AMMA                  | 64.74     | 6.26  | 53-78        | 63.244    | 7.03     | 46-76         | t(61.8)= -0.90;<br>p = 0.370                     |
| MSI                   | 208.65    | 17.59 | 161-234      | 210.79    | 15.12    | 185-246       | t(59.3)= 0.521;<br>p = 0.604                     |
| <b>PIS</b>            | 28.5      | 6.03  | 15-36        | 5.30      | 4.33     | 0-21*         | <b>t(52.2)= -17.37;</b><br><b>p &lt; 2.2e-16</b> |

Age, nonverbal IQ (SPM), information processing capacity (ZVT), musical training (total hours during life span on main instrument), musicality (AMMA; MSI) and online pitch identification screening (PIS) for each group; \* two RP reported not having absolute pitch but reached a screening score of 13 respectively 21. Because of this and their weak performance in the pitch adjustment test, the subjects were assigned to the RP group; Significant group differences highlighted in bold.

121

122

123 *Experiments and material*

124 **Pitch Adjustment Test (PAT)**

125 Absolute pitch ability was measured by using two different absolute pitch tests: The pitch  
126 identification screening (PIS) during the online survey mentioned above, and a pitch adjustment test  
127 (PAT) based on Dohn et al. [69]. Participants were given a maximum of 15 seconds to adjust the  
128 frequency of a sine wave with random start frequency (220 -880 Hz, 1Hz steps) and told to try to hit  
129 the target note (letter presented central on PC screen, e.g. “F# / Gb”) as precisely as possible  
130 without the use of any kind of reference. Online pitch modulation was programmed according to  
131 Dohn et al. [69] and provided by turning a USB-Controller (Griffin PowerMate NA16029, Griffin  
132 Technology, 6001 Oak Canyon, Irvine, CA, USA). Resolution of the Power Mate was set to 10  
133 cents vs. 1 cent (if pressed during turn of the wheel) for individual choice between rough and fine  
134 tuning. To confirm their answer, participants were instructed to press a button on a Cedrus  
135 Response Pad (Response Pad RB-844, Cedrus Corporation, San Pedro, CA 90734, USA) to  
136 automatically proceed with the next trial. If no button was hit, the final frequency after 15 seconds  
137 was taken. In both cases, the Inter Trial Interval (ITI) was set to 3000 ms. The total test consisted of  
138 108 target notes, presented in semi-random order in 3 Blocks of 36 notes each (3\*12 different notes  
139 per block) with individual breaks between the blocks. The final or chosen frequencies of each  
140 participant were compared to the nearest target tone (< 6 semitones/600cent), as participants were  
141 allowed to choose their octave of preference. EEG was measured during the PAT but will be  
142 reported elsewhere. For each participant, mean absolute derivation (MAD (1),[69]) from target tone

143

144 
$$(1) \text{MAD} = \frac{\sum_{i=1}^{N_{\text{adjustment}}} |c_i|}{N_{\text{adjustment}}}$$

145

146 is calculated as the mean of the average absolute deviations  $c_i$  (2) of the final frequencies to the  
147 target tone (referenced to a 440 Hz equal tempered tuning).

148

149 MAD reflects the pitch adjustment accuracy of the participants. The consistency of the pitch  
150 adjustments, possibly reflecting the tuning of the pitch template[69], is then estimated by taking the  
151 standard deviation of the absolute deviations (2).

$$152 \quad (2) \quad SDfoM = \sqrt{\frac{\sum_{i=1}^{N_{adjustment}} |C_i|}{N_{adjustment}-1}}$$

153 For regression analyses (see below), we performed a z-standardization of the MAD ( $Z\_MAD$ ,(3))  
154 and SDfoM ( $Z\_SDfoM$ , (4)) values relative to the mean and sd of the non-AP-group, as originally  
155 proposed by Dohn et al. [69].

156

$$157 \quad (3) \quad Z\_MAD_i = \frac{MAD_i - \mu(MAD)_{Non-AP}}{\sigma(MAD)_{Non-AP}}$$

158

$$159 \quad (4) \quad Z\_SDfoM_i = \frac{SDfoM_i - \mu(SDfoM)_{Non-AP}}{\sigma(SDfoM)_{Non-AP}}$$

160

## 161 **Autistic Traits**

162 Autism traits were assessed during the online survey using a standardized Adult Autism Spectrum  
163 Quotient (AQ, [70]; German version by C.M. Freiburg, available online:  
164 [https://www.autismresearchcentre.com/arc\\_tests](https://www.autismresearchcentre.com/arc_tests)). It consists of 50 items within five subscales  
165 (attention to detail, attention switching, imagination, social skills and communication). One point is  
166 given for each item with a mildly or strongly agreement with the autistic-like symptoms (half the  
167 items were negatively poled. The maximum AQ-Score therefore is 50).

168

## 169 **EEG Resting State**

170 EEG resting state data was acquired immediately before the PAT at the beginning of the  
171 experimental session using 28 scalp electrodes (sintered silver/silver chloride; Fp1, Fp2, F3, F4,  
172 FC3, FC4, C3, C4, CP3, CP4, P3, P4, F7, F8, FT7, FT8, T7, T8, TP7, TP8, P7, P8, O1, O2, Oz, Fz,  
173 Cz, Pz) placed according to the international extended 10-20 System with an electrode cap by



174 EASYCAP (EASYCAP GmbH, Herrsching, Germany; <http://www.easycap.de>). A 32-channel  
175 SynAmps amplifier (Compumedics Neuroscan, Inc., Charlotte, NC, USA) and the software Scan  
176 4.3 (Compumedics Neuroscan) were used to record the data. The remaining 2 bipolar channels were  
177 used for vertical and horizontal electro-oculogram with electrodes placed above and below the right  
178 eye and approximately 1cm outside of the outer canthus of each eye, respectively. Two further  
179 electrodes were placed on the left and right mastoids as a linked reference. The ground electrode  
180 was placed between the eyebrows directly above the nasion on the forehead. Abralyth 2000  
181 abrasive chloride-free electrolyte gel (EASYCAP GmbH, Herrsching, Germany;  
182 <http://www.easycap.de>) was used to keep impedances below 5k $\Omega$ . Participants were seated in a  
183 comfortable chair in front of a PC screen and were instructed to let their mind wander around while  
184 looking at a fixation cross (eyes open resting state, EO) or keeping their eyes closed (eyes closed  
185 resting state, EC) for 5 minutes each. Start (button press) and end of the resting state period were  
186 programmed within PsychoPy [71] by sending triggers via a parallel port to the EEG-system. A  
187 sampling rate of 1000 Hz was used combined with an online-bandpass filter between 0.5-100Hz  
188 and a Notch-filter at 50 Hz. EEG was recorded in AC (alternating current)-mode and with a gain of  
189 1000.

190  
191 *EEG Preprocessing and Analysis*

## 192 **Preprocessing**

193 All preprocessing steps were conducted using MATLAB (MATLAB Release 2014a, MathWorks,  
194 Inc., Natick, Massachusetts, United States) using the toolboxes eeglab [72] and fieldtrip [73]. EEG  
195 raw data was first re-sampled to 512 Hz sampling rate and bandpass filtered to 1-100 Hz. Artefact  
196 removal was administered using both, raw data inspection of continuous data and independent  
197 component analysis (ICA, algorithm: binica) within eeglab for each participant's data individually.  
198 ICA-components containing vertical or horizontal eye movements, blinking, heartbeat, muscular  
199 activity or other artefacts were removed from the data by inverse ICA. After that, segments still  
200 containing the above mentioned artefacts were removed manually. Defective or highly noisy

201 electrodes were interpolated using spherical interpolation [74] implemented in eeglab (5  
202 participants, 1-2 electrodes each). All statistical analyses were repeated under exclusion of  
203 participants with interpolated electrodes as well as non-native German speakers and the participant  
204 which reported to take Mirtazapine. Direction and significance of effects was not affected by the  
205 exclusions, therefore all participants were included into the final analyses. Afterwards, the artefact  
206 clean data was exported to fieldtrip for connectivity and network analysis (next steps).

207

### 208 **Connectivity – weighted Phase Lag Index (wPLI)**

209 Calculation of functional connectivity was done using MATLAB scripts (see:  
210 [https://github.com/rb643/fieldtrip\\_restingState/blob/master/rb\\_EEG\\_Conn.m](https://github.com/rb643/fieldtrip_restingState/blob/master/rb_EEG_Conn.m)). First, 4s-epochs  
211 (non-overlapping) were extracted from the artefact-clean data. Second, multi-taper Morlet fast  
212 Fourier transformation was used to extract frequency bands (delta: 2-4 Hz, theta: 4-7 Hz, alpha: 7-  
213 13 Hz, beta: 13-30 Hz, gamma: 30-60 Hz). For delta and theta single-taper (Hanning window) was  
214 used. Contrary, for alpha, beta and gamma multiple tapers (discrete prolate spheroidal sequences,  
215 DPSS) were taken. During multi-tapering of alpha, beta and gamma spectral smoothing was applied  
216 (+-1,2,4 Hz, respectively). Finally, pairwise connectivity values for each electrode site were  
217 calculated per participant and stored in a connectivity matrix for each frequency band separately.  
218 Weighted phase lag index [75] was chosen as connectivity measure, as phase based connectivity  
219 measures compared to coherence and phase synchronization measures are less sensitive to volume  
220 conduction in the brain [76, 77] cited by [78]), i .e. spurious connectivity between two regions of  
221 interest caused by a common source of activity or a common reference [79] and usually leads to  
222 connectivity values with phase lags of zero or pi (if the two sites are on opposite sides of the dipole)  
223 [80]. PLI (5)

224

$$225 \quad (5) \text{ PLI}_{xy} = |n^{-1} \sum_{t=1}^n \text{sgn}(\text{imag}(S_{xyt}))|$$

226

227 is an index that quantifies the asymmetry of the distribution of instantaneous phase-differences  $\Delta\Phi$   
228 between the signals  $x$  and  $y$ , by averaging the sign ( $\text{sgn}$ ) of the imaginary components ( $\text{imag}$ ) of the  
229 cross-spectrum ( $S_{xyt}$ ) at timepoint  $t$  [80]. The distribution is centered around  $0 \bmod \pi$ , therefore an  
230 asymmetric distribution shows non-zero phase lag. Stam et al. [79] argue, that a non-zero phase lag  
231 cannot be caused by volume conduction or a common reference, as the latter work instantaneously.  
232 PLI takes values between 0 and 1, where 0 indicates no phase coupling (or a coupling with a  $0 \bmod$   
233  $\pi$  phase difference) and 1 indicates a perfect coupling at the phase lag of  $\Delta\Phi$ . Because of the  
234 absolute values taken in equation (1) PLI does not give information about which signal is leading  
235 [79]. PLI has been shown to be superior in detecting true synchronization and in being less  
236 influenced by common source activity and electrode montage systems than phase coherence (PC,  
237 [81]), both in computer simulations and on real EEG and MEG data [79]. Furthermore, PLI exhibits  
238 a similar amount of long to short distance connections in an investigation of beta-band coupling in  
239 Alzheimer data [79, 82] which was shifted towards short-range connections implying volume  
240 conduction when using PC [79]. As the aim of this paper is to compare graph theory based network  
241 measures that especially quantify segregation versus integration in the brain (see section Network  
242 analysis – Graph Theory) the use of PLI is to be preferred to prevent the distortion of the network  
243 parameters by volume conduction [65, 66]. The extension of PLI, weighted PLI (wPLI, (6) [75]),

244

$$245 \quad (6) \ wPLI_{xy} = \frac{n^{-1} \sum_{t=1}^n |\text{imag}(S_{xyt})| \text{sgn}(\text{imag}(S_{xyt}))}{n^{-1} \sum_{t=1}^n |\text{imag}(S_{xyt})|}$$

246

247 weights the obtained phase leads or lags by the magnitude of the imaginary component ( $\text{imag}$ ) of  
248 the cross-spectrum ( $S_{xyt}$ ). This reduces the influence of additional noise sources [75, 80]. Weighted  
249 phase-lag-index [75] therefore is an advancement of phase lag index (PLI, [79]) and a suitable  
250 measure to detect true connectivity between regions of interest [79], as it ignores zero- and  $\pi$ -  
251 phase-lag.

252 **Network analysis - Graph Theory**

253 Graph network analyses were conducted using Brain Connectivity Toolbox (BCT,[85]) in Matlab.  
254 Graph theory is a branch of mathematics that deals with the abstract representation of networks as  
255 graphs, i.e. a system of  $n$  nodes and  $k$  edges (connections) between the nodes. Increasingly, network  
256 science is being applied to a range of neuroanatomical and -physiological data (e.g. [41, 43, 86–91])  
257 and at different scales of interest (e.g. neurons/populations of neurons, cortical areas, electrode  
258 sites; see [62, 85, 92–94] for an overview). In the present study, the pairwise connectivity measures  
259 for each frequency band and participant were stored in a 28x28 (channel by channel)-matrix.  
260 Therefore, electrode sites are defined as nodes and the wPLI indexes of the electrode pairs within  
261 the matrix as edges. This was done in two steps: First, to construct adjacency matrices for graph  
262 analyses, minimal spanning tree (MST: van Wijk et al., 2010) was used as the threshold starting  
263 point for building binary networks at various densities. The density of a network relates to the  
264 fraction of edges present in the network compared to the maximum possible number of edges. MST  
265 was chosen to ensure that across participant we were comparing network with similar numbers of  
266 nodes (e.g. differential thresholding without MST can lead to unconnected nodes and as a result  
267 networks of different sizes). Afterwards, we investigated network properties over a range of  
268 densities (0.036, 0.079, 0.106, 0.132, 0.159, 0.212, 0.238, 0.265, 0.291; percent of all possible  
269 connections, i.e. ten thresholding levels) by stepwise adding the highest remaining edges. This lead  
270 to ten adjacency matrices, for each frequency band and participant.

271

272 To estimate the differences in global network structure of the brain, we analyzed two graph  
273 theoretical network parameters reflecting segregation (Average Clustering Coefficient) and  
274 integration (Average Shortest Path Length) of the brain [62, 63, 95, 96]. It has been shown in a  
275 variety of simulations and network analyses of imaging data, that the human brain, among other  
276 biological systems and animal brains [93, 97], exhibits a small world architecture [93], which leads  
277 to an advantage of efficient information transfer while keeping the anatomical costs low [98, 99].  
278 Compared to the two studies by Jäncke et al. [41] and Loui et al. [43] the present investigation did

279 use network measures averaged over the whole brain and compared to those of a random network,  
280 instead of individual values per region. This is advantageous, as the vast variability of individual  
281 coherence within a network is reduced to one value per parameter and participant that reflects the  
282 small-worldness or efficiency of a brain network relative to a random or chaotic network [62, 82,  
283 85, 92–94]. By definition [62, 97, 98] Small-Worldness  $\sigma$  (7) is characterized by a  $C$ , which is  
284 much higher than that of a random network ( $\gamma = C_{real} / C_{random} \gg 1$ ), but has a comparable short  
285 path length ( $\lambda = L_{real} / L_{random} \approx 1$ ).

286

$$287 \quad (7) \quad \sigma = \frac{\gamma}{\lambda} = \frac{C_{real}^w / C_{random}^w}{L_{real}^w / L_{random}^w}.$$

288

289 Here the (8) Clustering Coefficient  $C_i$  of a node  $i$  is defined as the weighted average amount of (9)  
290 triangles  $t_i^w$  around it, i.e. the sum of connections between the neighbours of a node  $i$ , divided by  
291 the total amount of possible connections among its neighbors:

292

$$293 \quad (8) \quad C_i = \frac{1}{n} \sum_{i \in N} \frac{2t_i^w}{k_i(k_i-1)}$$

$$294 \quad (9) \quad t_i^w = \frac{1}{2} \sum_{j,h \in N} (w_{ij} w_{ih} w_{jh})^{\frac{1}{3}}.$$

295

296 The (10) Global Clustering Coefficient of a weighted association matrix  $C^w$  denotes the average  
297 clustering coefficient summed over all nodes  $i \in N$  in a network

298

$$299 \quad (10) \quad C^w = \frac{1}{n} \sum_{i \in N} C_i$$

300 and is interpreted as a measure of segregation of the network.

301 On the other hand the (11) Characteristic Path Length  $L_i$  of a node  $i$  is defined as the (12) average  
302 pairwise distance  $d_{ij}^w$  between the node  $i$  and any other node  $j$  in the weighted ( $w$ ) network

303

304 (11)  $L_i = \frac{1}{n} \sum_{i \in N} \frac{\sum_{j \in N, j \neq i} d_{ij}^w}{n-1}$

305 (12)  $d_{ij}^w = \sum_{a_{uv} \in g_{i \leftrightarrow j}^w} f(w_{uv}) .$

306

307 The (13) Global Average Path Length is then calculated by taking the average of the Characteristic  
308 Path Length of all nodes  $i \in N$  in the network

309

310 (13)  $L^w = \frac{1}{n} \sum_{i \in N} L_i$

311

312 and is interpreted as a measure of integration of the network. As both,  $\gamma$  and  $\lambda$  reflect the underlying  
313 brain network structure relative to a random network of the same density (and degree distribution)  
314 and influence the calculation of small-worldness, we chose to look at these parameters separately.  
315 That is, because we were specifically interested in the potentially differential relation of segregation  
316 and integration in the brain. Various authors have shown, that long-range-connections (integration)  
317 are more associated with synchronization in low frequency bands, whereas short-range-connectivity  
318 is mainly processed within beta-band (e.g. [100]).

319

### 320 *Statistical Analysis*

321 All statistical analyses were done using the open-source statistical software package R (Version  
322 3.5, <https://www.r-project.org/>).

323 We expected group differences between AP and RP regarding AQ-Scores, MAD (PAT), PIS (sum  
324 of correctly identified tones) and network parameters  $\gamma$  and  $\lambda$  (in beta, delta and theta band).

325 Additional unexpected results obtained in other frequency bands and network parameters are also  
326 reported. In order to correct for multiple comparisons across frequency bands, ten thresholds each

327 and various network parameters, only significant results within at least two successive thresholds

328 were considered significant. Results were obtained using t-tests and non-parametric equivalents

329 when applicable. Inter-correlations between the variables were investigated to further explore the  
 330 interrelation of autistic traits, absolute pitch performance and network structure using regression  
 331 and bivariate correlations. Finally, the network parameters  $\lambda$  and  $\gamma$ , AQ-Score and the age of  
 332 beginning to play a musical instrument (as a covariate) were used to predict PIS and PAT  
 333 performance within the sample using multiple regressions and AQ and AP performance to predict  
 334 network parameters.

335

## 336 Results

### 337 Behavioral performance and autism traits

338 Welch two-sample t-tests revealed significant lower absolute deviations from target tone (MAD;  
 339  $t(43.7) = 15.614$ ;  $p < 2.2e-16$ ) and lower deviations from individual mean deviation, i.e. interpreted  
 340 as pitch template (SDfoM;  $t(40.9) = 12.145$ ;  $p = 3.788e-15$ ) for absolute pitch compared to relative  
 341 pitch possessors (Table 2). Having AP was further associated with more autistic traits (AQ;  $t(60.3)$   
 342  $= -2.501$ ;  $p < 0.015$ ) and (marginally) an early start of musical training (starting age;  $t(55.4) =$   
 343  $1.751$ ;  $p < 0.086$ ). For AQ, only the subscale “imagination” reached significance ( $t(57.4) = -4.287$ ,  $p$   
 344  $< 6.997e-05$ ) with higher values for AP, while “communication” ( $t(55.3) = -1.977$ ,  $p = 0.053$ ) and  
 345 “attention to detail” ( $t(61.6) = -1.776$ ,  $p = 0.081$ ) were marginally and “social skills” ( $t(60.9) =$   
 346  $1.145$ ,  $p = 0.257$ ) and “attention switching” ( $t(62.0) = 1.012$ ,  $p = 0.316$ ) not significant.

347

**Table 2 Group differences**

|              | AP (n=31) |       |                 | RP (n=33) |        |                    | t-test*                                                               |
|--------------|-----------|-------|-----------------|-----------|--------|--------------------|-----------------------------------------------------------------------|
|              | Mean      | SD    | Range           | Mean      | SD     | Range              |                                                                       |
| <b>AQ</b>    | 20.48     | 6.05  | 10-36           | 16.88     | 5.44   | 6-27               | <b><math>t(60.3) = -2.501</math>;<br/><math>p = 0.015</math></b>      |
| <b>MAD</b>   | 41.37     | 36.49 | 9.8 -<br>200.57 | 296.84    | 86.12  | 91.04 -<br>467.52  | <b><math>t(43.7) = 15.614</math>;<br/><math>p &lt; 2.2e-16</math></b> |
| <b>SDfoM</b> | 52.31     | 44.96 | 7.41-<br>235.69 | 329.77    | 122.77 | 134.37 -<br>811.73 | <b><math>t(40.9) = 12.145</math>;<br/><math>p = 3.788e-15</math></b>  |
| starting age | 5.97      | 2.97  | 2-17            | 7.12      | 2.22   | 3-12               | $t(55.4) = 1.751$ ;<br>$p = 0.086$                                    |

Age, nonverbal IQ (SPM), information processing capacity (ZVT), musical training (total hours during life span on main instrument), musicality (AMMA; MSI) and online pitch identification screening (PIS) for each group; \* one RP has reported himself not having absolute pitch but reached a screening score of 13. Because of this and the weak performance in the pitch adjustment test, the subject was assigned to the RP group. Significant group differences highlighted in bold. \* Welch-two sample t-test

348

349 *Network analysis*

350 Welch two sample t-tests ( $p < 0.05$ , uncorrected) revealed higher average Path length  $\lambda$  for AP  
351 compared to RP within the delta band (2-4 Hz) for both, eyes open (EO) and eyes closed (EC),  
352 resting state conditions and at least two thresholds each. Lower path length values for AP were  
353 found in alpha (7-13 Hz) and beta (13-18 Hz) eyes open condition for one threshold each but did  
354 not reach significance ( $p < 0.10$ ; see figure 1). Analysis of Clustering Coefficient  $\gamma$  yielded lower  
355 Clustering for AP in EO delta ( $p < 0.05$ ) for one threshold and EO beta ( $p < 0.10$ ) for two neighboring  
356 thresholds. RP exhibited higher Clustering for a single threshold in EO theta ( $p < 0.10$ ). Small  
357 Worldness  $\sigma$  was widely reduced in AP within EC gamma, EC alpha and EO alpha with significant  
358 ( $p < 0.05$ ) or marginal significant ( $p < 0.10$ ) group differences across one or two thresholds each  
359 (figure 1). No significant higher thresholds were found for AP.

360

361 In general, significant and marginally significant results were spread widely across different  
362 thresholds (see figure 1). Only significant results appearing on at least two thresholds in the same  
363 frequency band were included in further analyses (multiple regression). Of those, the threshold (T)  
364 with the highest effect size of neighbouring significant results was taken: **Clustering  $\gamma$  EO beta**  
365 **(T= 0.2910), Small Worldness  $\sigma$  EC gamma (T=0.1322) and Path length  $\lambda$  EC delta**  
366 **(T=0.2116)**. Path length EO delta (T=0.0357) was not taken into account because of correlation  
367 with Path length EC delta (T=0.2116).

368

369 (Figure 1)

370

371 **Figure 1: Multiple comparisons (Welch two sample t-tests) across frequency bands,**  
372 **thresholds, eyes-closed vs. eyes-open RS between AP and RP.** Matrix cells contain p-values  
373 (uncorrected) and are colored according to Cohen's  $d$  values. Blue cells indicate higher SW (Small  
374 World), Lrand (Path length compared to random network) and Crand (Clustering compared to



375 random network) for AP compared to RP; red cells show higher parameters for RP. Significant  
 376 results ( $p < 0.05$ , \*;  $p < 0.01$ , \*\*;  $p < 0.001$ , \*\*\*) and tendencies ( $p < 0.10$ , “.”) are marked.

377

### 378 *Prediction of absolute pitch performance*

379 Multiple regression analysis was used to predict AP performance in pitch naming (PIS) and pitch  
 380 adjustment (PAT). A multiple regression predicting PIS performance by autistic traits (AQ; beta =  
 381 0.892,  $p < 0.0001$ ), Clustering (C\_EO\_b10; beta = -66.074,  $p < 0.0002$ ), Path length (L\_ECd10; beta =  
 382 76.909,  $p < 0.008$ ) and Small Worldness (ECg4; beta= -6.612,  $p < 0.0325$ ) explained 44% of the  
 383 variance ( $R^2 = 0.44$ ,  $R^2_{\text{adjusted}} = 0.401$ ;  $F(4,57) = 11.22$ ,  $p < 9.92e-17$ ). PAT performance was  
 384 predicted by the same predictors plus the age of begin of musical training (starting age) and  
 385 explained 38% of the variance ( $R^2 = 0.380$ ,  $R^2_{\text{adjusted}} = 0.326$ ;  $F(5,57) = 6.991$ ,  $p < 3.736e-05$ ). Here,  
 386 AQ (beta = -0.089,  $p < 0.004$ ), Clustering (beta = 6.775,  $p < 0.004$ ) and Small Worldness (beta=  
 387 0.946,  $p < 0.023$ ) significantly contributed to the prediction, while age of begin of musical training  
 388 (beta= 0.130,  $p < 0.053$ ) and Path length (beta= -7.006,  $p < 0.070$ ) remained marginal significant.  
 389 Bivariate pearson correlations among the variables are listed in table 3.

390

391

**Table 3 Bivariate correlations between variables of interest**

|         | Correlation coefficient (Pearson) |           |                         |                           |                  |                          |                        |                         |
|---------|-----------------------------------|-----------|-------------------------|---------------------------|------------------|--------------------------|------------------------|-------------------------|
|         | <i>PIS</i>                        | 0.38**    | -0.91***                | -0.85***                  | -0.23 .          | 0.35**                   | -0.30*                 | -0.28*                  |
|         | 0.002**                           | <i>AQ</i> | -0.28*                  | -0.25*                    | 0.025            | 0.13                     | 0.20                   | 0.022                   |
|         | <0.001***                         | 0.024*    | <i>MAD</i> <sup>a</sup> | 0.93***                   | 0.30*            | -0.27*                   | 0.28*                  | 0.31*                   |
| p-value | <0.001***                         | 0.045*    | $p < 0.001$ ***         | <i>SDfoM</i> <sup>a</sup> | 0.25 .           | -0.21 .                  | 0.25 .                 | 0.21 .                  |
|         | 0.074 .                           | 0.844     | 0.017*                  | 0.053 .                   | <i>start age</i> | 0.018                    | 0.22 .                 | 0.10                    |
|         | 0.005**                           | 0.315     | 0.033*                  | 0.094 .                   | 0.887            | $\lambda$ <i>ECdelta</i> | 0.08                   | -0.23 .                 |
|         | 0.017*                            | 0.109 .   | 0.026*                  | 0.051 .                   | 0.079 .          | 0.534                    | $\gamma$ <i>EObeta</i> | -0.044                  |
|         | 0.028*                            | 0.866 .   | 0.013*                  | 0.100 .                   | 0.431            | 0.075 .                  | 0.731                  | $\sigma$ <i>ECgamma</i> |

Pearson correlations between variables of interest (network parameters: selected bands and thresholds); significant correlation coefficients are highlighted with stars. <sup>a</sup> variables were z-standardized to the mean and sd of the non-AP population

392

### 393 *Prediction of network parameters*

394 To further investigate the interrelation between AP, autistic traits and network connectivity, we  
 395 calculated general linear models to predict network connectivity (L, C, SW) differences obtained  
 396 before by a combination of AP performance and AQ. Different models were compared using  $R^2$ ,  
 397  $R^2_{\text{adjusted}}$  and information criteria (AIC). Separate models are shown for active (PAT) and passive

398 (PIS) AP performance as for their high collinearity. Only Clustering obtained a better prediction by  
 399 a joint model of AQ and AP performance (active and passive on separate models because of  
 400 intercorrelation) with AQ as a significant predictor. While inclusion of AQ-Scores did not improve  
 401 the prediction of path length and small worldness (see table 4), it was predictive for Clustering  
 402 Coefficients in the beta range in each, a joint model with either MAD ( $F(2,60)=6.011$ ,  $p<0.004$ ;  
 403  $R^2=0.167, R^2_{\text{adjusted}}=0.139$ ;  $\beta_{\text{AQ}}=4.06e-3$ ,  $p<0.014$ ;  $\beta_{\text{MAD}}=2.07e-4$ ,  $p<0.004$ ) or PIS-performance  
 404 ( $F(2,59)=6.889$ ,  $p<0.002$ ;  $R^2=0.189, R^2_{\text{adjusted}}=0.162$ ;  $\beta_{\text{AQ}}=4.44e-3$ ,  $p<0.009$ ;  $\beta_{\text{MAD}}=-2.62e-3$ ,  
 405  $p<0.0041$ ). Both models were superior compared to a prediction of network connectivity by AP  
 406 performance alone, even though the bivariate correlation between AQ and Clustering did not reach  
 407 significance (see previous section)  
 408

**Table 4 Comparison of models predicting network parameters by AP and AQ**

| $\gamma$ EObeta   | Predictors ( $\beta$ ) |            |            |           |               | comparison of models |                |                                    |         |
|-------------------|------------------------|------------|------------|-----------|---------------|----------------------|----------------|------------------------------------|---------|
|                   | intercept              | MAD        | PIS        | AQ        | F(df)         | p-value              | R <sup>2</sup> | R <sup>2</sup> <sub>adjusted</sub> | AIC     |
| <i>Model 1</i>    | 3.54e-1 ***            | 2.07e-4 ** | -          | 4.06e-3 * | 6.011 (2,60)  | <0.004 **            | 0.167          | 0.139                              | -145.45 |
| <i>Model 2</i>    | 4.383e-1 ***           | 1.58e-4*   | -          | -         | 5.232 (1,60)  | <0.026*              | 0.078          | 0.064                              | -141.13 |
| <i>Model 3</i>    | 4.25e-1 ***            | -          | -2.62e-3** | 4.44e-3** | 6.889 (2, 59) | <0.002**             | 0.189          | 0.162                              | -146.01 |
| <i>Model 4</i>    | 4.96e-1 ***            | -          | -1.83e-3*  | -         | 6.009 (1,60)  | <0.017*              | 0.091          | 0.076                              | -140.91 |
| $\sigma$ ECgamma  | intercept              | MAD        | PIS        | AQ        | F-value       | p-value              | R <sup>2</sup> | R <sup>2</sup> <sub>adjusted</sub> | AIC     |
| <i>Model 1</i>    | 5.4e-1 *               | 1.02e-3*   | -          | 5.25e-3   | 3.378 (2,60)  | <0.041*              | 0.101          | 0.071                              | 74.09   |
| <i>Model 2</i>    | 6.49e-1 ***            | 9.57e-4 *  | -          | -         | 6.504         | <0.013*              | 0.096          | 0.081                              | 72.43   |
| <i>Model 3</i>    | 8.08e-1 ***            | -          | -1.11e-2*  | 9.30e-3   | 2.981 (2,59)  | <0.058               | 0.092          | 0.061                              | 73.53   |
| <i>Model 4</i>    | 9.56e-1 ***            | -          | -9.41e-3*  | -         | 5.06 (1,60)   | <0.028*              | 0.078          | 0.062                              | 72.48   |
| $\lambda$ ECdelta | intercept              | MAD        | PIS        | AQ        | F-value       | p-value              | R <sup>2</sup> | R <sup>2</sup> <sub>adjusted</sub> | AIC     |
| <i>Model 1</i>    | 1.82 ***               | -8.34e-5   | -          | 4.40e-04  | 2.433 (2,60)  | 0.096                | 0.075          | 0.044                              | -205.34 |
| <i>Model 2</i>    | 1.83 ***               | -8.88e-5*  | -          | -         | 4.736 (1,61)  | <0.033*              | 0.072          | 0.057                              | -207.14 |
| <i>Model 3</i>    | 1.79 ***               | -          | 1.30e-3 ** | -1.29e-5  | 4.228 (2,59)  | <0.019*              | 0.125          | 0.096                              | -204.45 |
| <i>Model 4</i>    | 1.79 ***               | -          | 1.29e-3 ** | -         | 8.6 (1,60)    | <0.005**             | 0.125          | 0.111                              | -206.45 |

Parameters, significance (F-statistics) and comparison of different models. Models are compared using R<sup>2</sup>, R<sup>2</sup><sub>adjusted</sub> and AIC (Akaike information criterion). Smaller AIC and higher R<sup>2</sup> indicate superior models. Significance: p<0.05 \*, p<0.01 \*\*, p<0.01 \*\*\* (uncorrected).

409

410

#### 411 *Post-hoc analysis: single connection statistics*

412 To assess single connection differences in the beta frequency band, permutation statistics  
 413 ( $n_{\text{permutations}}=10000$ ) across groups were evaluated post-hoc. To obtain these, raw matrices in the  
 414 relevant frequency bands (significant results) were z-standardized individually and permutation  
 415 group statistics (FDR corrected) performed across groups using custom MATLAB scripts. An  
 416 unstandardized comparison was provided as well. While the former reflects the relative importance  
 417 of the connections within the participants' networks between the groups, the latter shows group

418 differences in the absolute wPLI. Results revealed overall increased wPLI values for AP in a  
419 network comprising mainly left frontal and parietal regions (especially nodes: F7, F3, F4, P3; see  
420 table 5 for anatomical correlations) combined with lower connectivity within and between bilateral  
421 temporal regions (FT7-T8, FT7-T7, FT8-T8; unstandardized results). Relative to their own  
422 networks (z-standardized participants matrices), AP's exhibited reduced connectivity compared to  
423 RP between left FT7 and various sites along frontal-temporal-occipital electrodes  
424 (F8, T8, TP8, P8, P3) in the right hemisphere, especially again within and between bilateral temporal  
425 regions (FT7-T8, FT7-T7, FT8-T8). The only significant higher connections relative to their own  
426 network for AP were found between F7, F8 and P7. Figure 2 (brain nets created using the Matlab  
427 Toolbox BrainNet Viewer [101]) shows Cohen's d effect size values for all pairs of electrodes  
428 between groups in separate matrices for z-standardized vs. unstandardized raw connectivity  
429 matrices. The most pronounced differences that were found in both, standardized and  
430 unstandardized (relative) comparisons, comprise reduced interconnection between bilateral auditory  
431 cortices (FT7-T8, FT7-T7, FT8-T8) as well as higher frontal-parietal connectivity (F7- F8, F8-P7)  
432 for AP. These connections therefore not only exhibit a group difference on absolute wPLI values,  
433 but also play a different role relative to the other connections in the participants networks.  
434 (Figure 2)

435

436 **Figure 2 Visualization of single connection differences in the beta range.** left: Cohen's d effect  
437 size values for all pairs of electrodes between groups in separate matrices for unstandardized (top)  
438 vs. z-standardized (bottom) raw connectivity matrices (permutation testing). Significant connections  
439 (FDR corrected) are highlighted in light blue. right: significant differences plotted in EEG-cap order  
440 (extended 10-20 system, view from above). Colors indicate direction of effect (blue: AP>RP,  
441 yellow: RP<AP) and size of the line the corresponding effect size (Cohen's d).

442

443 Rough anatomical associations of electrode positions, taken from Koessler et al. [102], are  
 444 summarized in table 5. However, it must be clearly said, that graph theoretical accounts and single  
 445 connection permutation tests are completely different techniques and cannot be compared directly.  
 446 This is, because in the course of graph theoretical analysis, thresholds have to be applied on the  
 447 participants' raw matrices, leading to a reduced number of total connections. Thus the connections  
 448 fed into graph analysis also highly depend on the participant specific order of connection weights  
 449 and can have a high regional variability despite producing similarly high or low network  
 450 parameters.  
 451

Table 5 Cranio-Cerebral Correlations for electrode positions (10-10 system, modified after [110])

| Electrode label | Talairach coordinates (mm) |           |          | lobe | gyri                | anatomical region<br>BA                        |
|-----------------|----------------------------|-----------|----------|------|---------------------|------------------------------------------------|
|                 | x                          | y         | z        |      |                     |                                                |
| FP1             | -21.2±4.7                  | 66.9±3.8  | 12.1±6.6 | L FL | Superior frontal G  | 10 (100%)                                      |
| FP2             | 24.3±3.2                   | 66.3±3.5  | 12.5±6.1 | R FL | Superior frontal G  | 10 (100%)                                      |
| F3              | -39.7±5.0                  | 25.3±7.5  | 44.7±7.9 | L FL | Middle frontal G    | (75%), 6 (19%), 46 (6%)                        |
| F4              | 41.9±4.8                   | 27.5±7.3  | 43.9±7.6 | R FL | Middle frontal G    | 8 (69%), 6 (6%), 9 (25%)                       |
| FC3             | -45.5±5.5                  | 2.4±8.3   | 51.3±6.2 | L FL | Middle frontal G    | 6 (75%), 4 (12,5%), 8 (12,5%)                  |
| FC4             | 47.5±4.4                   | 4.6±7.6   | 49.7±6.7 | R FL | Middle frontal G    | 8 (69%), 6 (6%), 9 (25%)                       |
| C3              | -49.1±5.5                  | -20.7±9.1 | 53.2±6.1 | L PL | Postcentral G       | 21 (62,5%), 22 (25%), 20 (6,5), 42 (6%)        |
| C4              | 50.3±4.6                   | -18.8±8.3 | 53.0±6.4 | R PL | Postcentral G       | 123 (81,5%), 6 (12,5), 40 (6%)                 |
| CP3             | -46.9±5.8                  | -47.7±9.3 | 49.7±7.7 | L PL | Inferior parietal G | 40 (82%), 123 (6%), 5 (6%), 39 (6%)            |
| CP4             | 49.5±5.9                   | -45.5±7.9 | 50.7±7.1 | R PL | Inferior parietal G | 40 (77,5%), 123 (12,5%)                        |
| P3              | -41.4±5.7                  | -67.8±8.4 | 42.4±9.5 | L PL | Precuneus           | 39 (37,5%), 7 (25%), 19 (25%), 40 (12,5%)      |
| P4              | 44.2±6.5                   | -65.8±8.1 | 42.7±8.5 | R PL | Inferior parietal L | 39 (31%), 7 (25%), 40 (25%), 19 (19%)          |
| F7              | -52.1±3.0                  | 28.6±6.4  | 3.8±5.6  | L FL | Inferior frontal G  | 45 (56%), 47 (38%), 46 (6%)                    |
| F8              | 53.2±2.8                   | 28.4±6.3  | 3.1±6.9  | R FL | Inferior frontal G  | 45 (37,5%), 47 (37,5%), 46 (25%)               |
| FT7             | -59.2±3.1                  | 3.4±5.6   | -2.1±7.5 | L TL | Superior temporal G | 22 (75,5%), 21 (12,5%), 38 (6%), 44 (6%)       |
| FT8             | 60.2±2.5                   | 4.7±5.1   | -2.8±6.3 | R TL | Superior temporal G | 22 (75%), 21 (13%), 38 (6%), 44 (6%)           |
| T7              | -65.8±3.3                  | -17.8±6.8 | -2.9±6.1 | L TL | Middle temporal G   | 21 (81,5%), 22 (12,5%), 43 (6%)                |
| T8              | 67.4±2.3                   | -18.5±6.9 | -3.4±7.0 | R TL | Middle temporal G   | 4 (50%), 123 (25%), 6 (25%)                    |
| TP7             | -63.6±4.5                  | -44.7±7.2 | -4.0±6.6 | L TL | Middle temporal G   | 21 (50%), 37 (25%), 22 (19%), 20 (6%)          |
| TP8             | 64.6±3.3                   | -45.4±6.6 | -3.7±7.3 | R TL | Middle temporal G   | 21 (62,5%), 22 (12,5%), 20 (12,5%), 37 (12,5%) |
| P7              | -55.9±4.5                  | -64.8±5.3 | 0.0±9.3  | L TL | Inferior temporal G | 37 (44%), 19 (38%), 39 (18%)                   |
| P8              | 56.4±3.7                   | -64.4±5.6 | 0.1±8.5  | R TL | Inferior temporal G | 19 (56%), 37 (19%), 20 (12,5), 39 (12,5%)      |
| O1              | -25.8±6.3                  | -93.3±4.6 | 7.7±12.3 | L OL | Middle occipital G  | 18 (81%), 19 (19%)                             |
| O2              | 25.0±5.7                   | -95.2±5.8 | 6.2±11.4 | R OL | Middle occipital G  | 18 18 (81%), 19 (19%)                          |
| Oz              | 0.3±5.9                    | -97.1±5.2 | 8.7±11.6 | M OL | Cuneus              | 18 (62,5), 17 (31%), 19 (6,5%)                 |
| Fz              | 0.0±6.4                    | 26.8±7.9  | 60.6±6.5 | M FL | Bilateral medial    | 6 (81,5%), 8 (12,5%), 9 (6%)                   |
| Cz              | 0.8±4.9                    | -21.9±9.4 | 77.4±6.7 | M FL | Precentral G        | 4 (62,5%), 6 (37,5%)                           |
| Pz              | 0.7±6.3                    | -69.3±8.4 | 56.9±9.9 | M PL | Superior parietal L | 7 (88%), 5 (6%), 19 (6%)                       |

Estimated projection of electrode positions to cortical areas (Talairach space) and variability of associated BA (Brodmann areas), investigated by [110] using EEG-MRI sensors. L=left, R=right, FL= frontal lobe, PL=parietal lobe, TL=temporal lobe, OL=occipital lobe; L=lobe, G=Gyrus.

452

## 453 Discussion

454 The results of the present study underline a possible interrelation between autistic traits, brain  
 455 connectivity and absolute pitch ability. We investigated EEG resting state connectivity using a  
 456 graph theory approach in professional musicians with and without absolute pitch, the Autism  
 457 Spectrum Quotient [70] and each a test of pitch naming and pitch adjustment ability. Analyses  
 458 revealed higher autistic traits, higher average Path length (delta 2-4 Hz)), lower average Clustering  
 459 (beta 13-20 Hz), lower Small-Worldness (gamma 30-60 Hz) and a tendency for an earlier start of

460 musical training in absolute pitch musicians. Furthermore, pitch naming was well predicted by  
461 autistic traits, Path length and Clustering values, explaining a total of 44% of the variance. Pitch  
462 adjustment (i.e. active absolute pitch) was explained by the same predictors plus the age of begin of  
463 musical training summing up to an  $R^2 = 0.38$ . However, in the latter case, the starting age of  
464 musical training and Path length remained marginally significant.

465 It is noteworthy that the start of playing a musical instrument in our models did not significantly  
466 improve the prediction of AP performance but only in pitch adjustment. Furthermore, the total  
467 amount of musical training during life was neither predictive of any AP performance in the general  
468 linear model, nor did show a group difference. The typical human brain exhibits a small-world like  
469 structure with a much higher Clustering compared to a random network, while maintaining an  
470 efficient information transfer and low wiring cost through an equally low path length [62, 93, 97].  
471 In this context, the results of the present study indicate a less efficient, less small-world structured  
472 functional network in AP compared to RP, in line with the structural results of Jäncke et al. [41] and  
473 results from the autism research [44, 45, 48, 90, 103] but extends the results to EEG functional  
474 connectivity networks.

475  
476 It is further interesting that both correlations and regressions between autistic traits and the two AP  
477 test show higher correlations and better prediction of pitch naming than pitch adjustment by AQ.  
478 This can be explained by the aforementioned theory of veridical mapping [7, 61]. This framework  
479 explains savant abilities and other unusual abilities in autism by their common characteristic of one-  
480 to-one mappings between elements of two conceptual or perceptual structures (e.g. letters-musical  
481 tones, letters-colors). According to this theory all of these abilities share further commonalities  
482 including hyper-systemizing [53], enhanced perceptual functioning [51, 52], depend on exposure to  
483 material and - if they occur as autistic savant ability - the related elements can also be recalled  
484 without a strategy [7, 61]). This explicit recall in absolute pitch, i.e. the naming of the pitch,  
485 therefore might be a more savant-like ability, leading to a higher correlation with autistic traits.

486 Furthermore, we observed reduced connectivity for AP compared to RP in interhemispheric  
487 connections when compared to the participants own distribution of connectivities (z-standardized  
488 calculation) – especially between left auditory located electrodes and various right temporal,  
489 parietal and frontal electrodes.

490

491 While higher Path length in low frequency bands (delta, therefore reduced integration) and lower  
492 Clustering in higher frequencies (beta, reduced segregation on sensor level) are in line with our  
493 apriori hypotheses, we did not expect reduced Small-Worldness within gamma-band for AP  
494 compared to RP (found during eyes closed). Nevertheless this result can be explained by previous  
495 research findings: Cantero et al. [104] reported increased gamma band measured by intracranial  
496 electrodes between hippocampal areas and neocortex in humans during wakefulness but not during  
497 sleep, pointing to a relation of gamma-band couplings and awareness states in humans. This also  
498 suggests, that gamma band activity, probably useful for the storage and retrieval of memory [105–  
499 107] and binding of perceptual features [106, 107] might even play a role during resting (awake  
500 more than asleep) states. AP ability, similarly, is often described as the ability to associate tones and  
501 verbal labels in a stable, hyper memorized way, pointing to the importance of long-term memory  
502 processes [108–112]. Furthermore, Bhattacharya et al. [113, 114] found increased long-range  
503 gamma synchronization between distributed cortical areas during music listening in musicians  
504 compared to non-musicians, which might reflect musical memory and binding of musical features.  
505 In contrast, Sun et al. [115] found reductions in gamma band phase locking and power in  
506 participants with autism associated with perceptual organization tasks (visual), while Brown et al.  
507 [116] found higher gamma peaks in response to illusory figures in autism. Generally, abnormal  
508 gamma activity is found in a range of neuropsychiatric disorders, with reduced gamma in negative  
509 schizophrenic symptoms, Alzheimer’s disease and task specific gamma decrease in autism, but an  
510 increase in gamma in ADHD, positive schizophrenic symptoms and epilepsy (for a review see [117,  
511 118]). Thus, the results of reduced Small-Worldness in AP are in line with an integration-deficit

512 hypothesis of AP, both in perceptual organization and binding of musical stimuli and in brain  
513 connectivity, which is again similar to autism (see [42, 44, 119–122]). However, the findings in  
514 gamma band did not show correlations with autistic symptoms.

515 Our results replicate the results of Dohn et al. [39] showing higher autistic traits, which reached  
516 significant in the subscales “imagination” (similar to [39]), “attention to detail” (marginally) and  
517 “social skills” (marginally). Furthermore, autistic traits were also not only correlated to pitch  
518 naming as already shown by Dohn et al. [39], but also to pitch adjustment accuracy (MAD, mean  
519 absolute deviation to target tone in cent ; 100 cent= 1 semitone) and adjustment consistency  
520 (SDfoM, pitch template tuning). However, similar to [39], group mean autistic traits did not reach  
521 the cutoff for diagnostic relevance, indicating a high variability regarding autistic traits even in the  
522 AP group (with 7 AP compared to 1 RP scoring above cutoff or borderline). This fits with analyses  
523 of the broader autism phenotype [123] and might implicate joint as well as divergent phenotypic  
524 and endotypic characteristics of AP and autism.

525

526 In contrast to our study, various previous studies have shown an influence of the start of musical  
527 training in AP, making the onset of training before the age of 7 necessary, but not sufficient to  
528 acquire absolute pitch [12, 16–19, 36]. For example, Loui et. al [36] recently found, that early onset  
529 of musical training was associated with an enlarged tract between pSTG and pMTG in the left  
530 hemisphere, but the degree of AP proficiency still correlated with the size of the tract after  
531 partialling out age of onset. Gregersen et al. [12] further analyzed familiar aggregation of AP in  
532 different samples of musicians and non-musicians with early and late onset of musical training  
533 comparing different types of musical education and found no general differences of AP between  
534 early or late starting siblings of AP. Their results further indicated a higher influence of genetic  
535 disposition and the type of education used, which both had a more pronounced influence than age of  
536 onset per se [12].

537

538 Higher average Path length (delta 2-4 Hz)), lower average Clustering (beta 13-20 Hz) and lower  
539 Small-Worldness (gamma 30-60 Hz) for AP compared to RP are also in line with previous studies  
540 showing structural local hyper-vs. global hypoconnectivity in AP [41] and reduced Clustering and  
541 higher Path length in participants with autism [103, 134]. In contrast, Loui et al. [43] reported  
542 overall increased degrees, clustering and local efficiency coefficients of functional networks in AP  
543 using fMRI during music listening and rest. The authors further speculate that there might be a  
544 “dichotomy between structural and functional hyperconnectivity in AP, where structure is locally  
545 hyperconnected but function is globally hyperconnected [43]. The present study, however, provided  
546 more evidence for an also functionally underconnected brain in AP musicians compared to relative  
547 pitch musicians. Diverging results compared to Loui et al. [43] might be due to differences in  
548 methods (EEG vs. fMRI) or different definition of nodes (electrode positions vs. brain regions) and  
549 edges (wPLI vs. functional correlations).

550

551 Differences seen in single connection analysis might reflect the connections that lead to differences  
552 in Clustering values described above. Similarly to the prediction of Clustering by AP and autistic  
553 traits, single connection differences in the beta range are in line with findings from the autism  
554 literature: First, various others have reported reduced interhemispheric connectivity in autism [48,  
555 102, 103, 135, 136]. Second, hypoconnectivity between left FT7 (BA: 22) and right frontal-  
556 temporal-occipital electrodes (F8, T8, TP8, P8, P4; BA: 45/47, 4, 21/22/20/37, 19/37, 39/7/40/19;  
557 see table 4 for anatomical interpretation of electrode positions) might reflect a specific  
558 underconnectivity between left STG and right IFOF, of which alterations have already been  
559 described in both AP [137] and Autism [138]. Especially reduced interhemispheric connectivity  
560 between left auditory related cortex and right IFOF might reflect autism-like personality traits and  
561 perception of (some) absolute pitch possessors. The IFOF, especially the right IFOF, has been  
562 shown to play an important role in music perception and the integration of musical features, as it  
563 connects various brain regions from frontal over temporal to posterior parts of the brain [139]. A



564 reduced white matter integrity of IFOF was found in amusics [139, 140], whereas people with  
565 synaesthesia and absolute pitch were shown to have a higher IFOF integrity [59, 137]. More  
566 importantly, however, increased interhemispheric connectivity in musicians was found by several  
567 studies [141–145] showing the importance of interhemispheric integration in music perception. A  
568 reduced interhemispheric functional connectivity, especially between bilateral auditory regions as  
569 found in the present study, perhaps might result in less perceptual integration of musical features  
570 (i.e. auditory weak central coherence) and hence a more detail oriented processing of music and  
571 musical pitches (i.e. absolute vs. relative) in those participants. An exaggeration of those features  
572 might also lead to symptoms of amusia, which has also been associated with alterations in left and  
573 right STG and right IFOF [139, 140, 146] and with autism [147]. However, it must be clearly said,  
574 that we cannot explicitly conclude anatomical differences from connectivity differences on the  
575 sensor levels. Further structural or functional studies using methods with high anatomical precision  
576 have to be conducted to evaluate this hypothesis.

577

578 Some caveats of the present approach are warranted. First, we did not use a source-based approach  
579 of functional connectivity, making conclusions with respect to anatomical associations of the  
580 obtained differences very speculative. Second, various different configurations of local and global  
581 hyper- vs. hypoconnectivity can be assumed to result into the same averaged network measures,  
582 therefore no conclusions can be made about the exact relative structure within the brain and among  
583 different regions. Nevertheless, higher Path length (EC, delta 2-4 Hz) can be interpreted as weaker  
584 integration in the network and higher Clustering (EO, 13-20 Hz) as higher local segregation of  
585 functions [85] and therefore might again reflect a local hyper- over global (integrative)  
586 hypoconnectivity in the brain of AP musicians. This interpretation is further encouraged by studies  
587 showing, that long-range connectivity (integration) is more reflected in low frequency bands,  
588 whereas short range connectivity is more high frequency bands [100, 148]. This again fits to the  
589 results of our study, as higher Clustering, indicative for local segregation, was found in the beta

590 range and Path length - indicative for global integration in the network and therefore long-range-  
591 associations - in the delta range.

592 In addition, significant group differences were highly selective for certain frequency bands, states  
593 (EO vs. EC) and thresholds. Nevertheless, we can rule out the possibility, that we obtained those  
594 differences by chance. First, there were significant differences for at least one threshold in a  
595 frequency band, effect sizes of the other thresholds in the same frequency band never (exclusive:  
596 Crand EO alpha) indicated reverse effects (see color code in figure 1). Second, we did only consider  
597 differences relevant, if at least two neighbouring thresholds exhibited a significant group difference.  
598 Third, the three network parameters selected via group differences always could also predict AP  
599 performance with a reasonable high  $R^2$  and/or showed bivariate correlations with AP performance  
600 in both tests of AP.

601

602 For the first time we included a pitch adjustment test of active absolute pitch [69] into a study on  
603 brain connectivity in AP, so we are not only referring to pitch naming as were previous studies [36,  
604 39, 41, 43]. Also, whereas Jäncke et al. [41] were using structural cortical thickness covariations  
605 and Loui et al. [43] functional correlations of fMRI activity (during rest and music listening) as  
606 weights for connections in graph analysis, we for the first time applied graph theory on resting state  
607 EEG connectivity of AP musicians, both in eyes closed and eyes open conditions. This is similar to  
608 methods used in analyzing brain connectivity in autism [49, 103]. Finally, while e.g. Elmer et al.  
609 [108] used phase synchronization as an estimate for functional EEG connectivity, we used wPLI  
610 (weighted phase lag index, [75]), which is less contaminated by volume conduction [75–78, 81]  
611 thus contributing to a higher validity and reliability with respect to true brain connectivity and graph  
612 theoretical parameters [79, 83, 84].

613

614 In summary, differences in network and connectivity analysis in the beta band seem to be  
615 specifically associated with the relation of autistic traits and absolute pitch, whereas Path length in

616 delta range and Small-Worldness in gamma range might reflect other influences on the acquisition  
617 of the ability (e.g. environmental factors, genetic factors not attributable to autistic traits, musical  
618 education method, instrument, learning, sensitive periods). To our knowledge this is the first study  
619 to combine measures on autistic traits and brain networks on musicians with and without absolute  
620 pitch. We conclude that this is further evidence showing, that AP and Autism both have shared and  
621 distinct neuronal and phenotypic characteristics. This might also be reflected in subgroups of AP  
622 with different genesis, providing new arguments for the discussion about a dichotomous or  
623 continuous view on AP. However, the causal relationship between AP, autistic traits and brain  
624 connectivity remains to be evaluated.

625

626

627

628

629

630

631

632

633

634

635

636

637

638

639

640

641

642 **Figures**

643 **Figure 1**

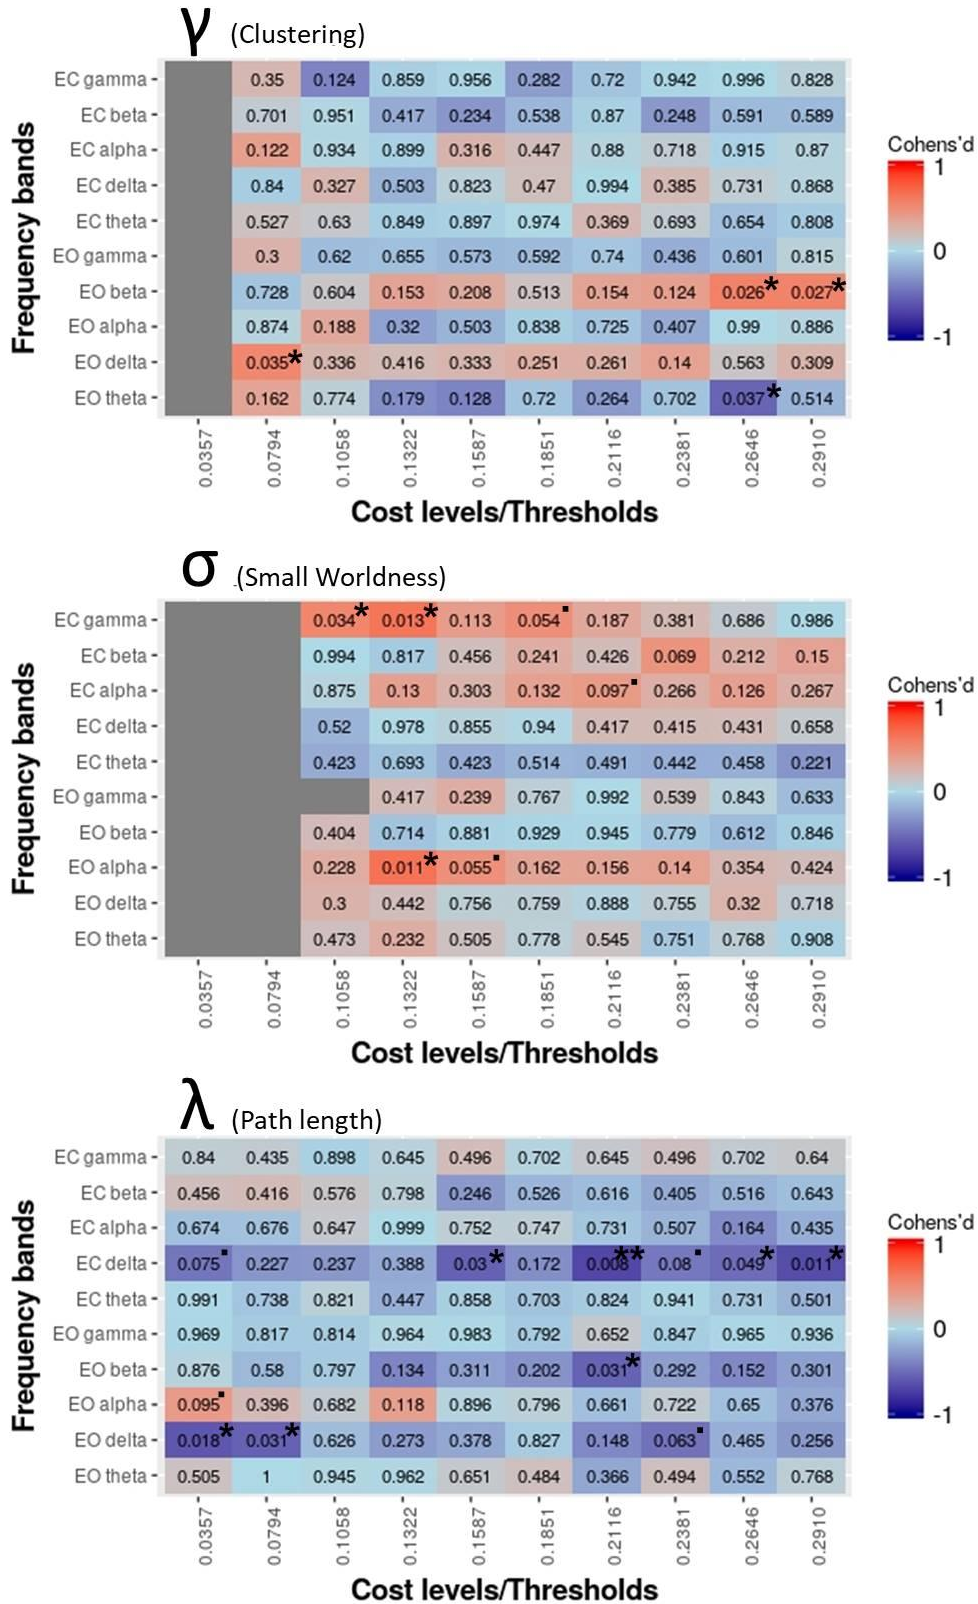

644

645 **Figure 2**

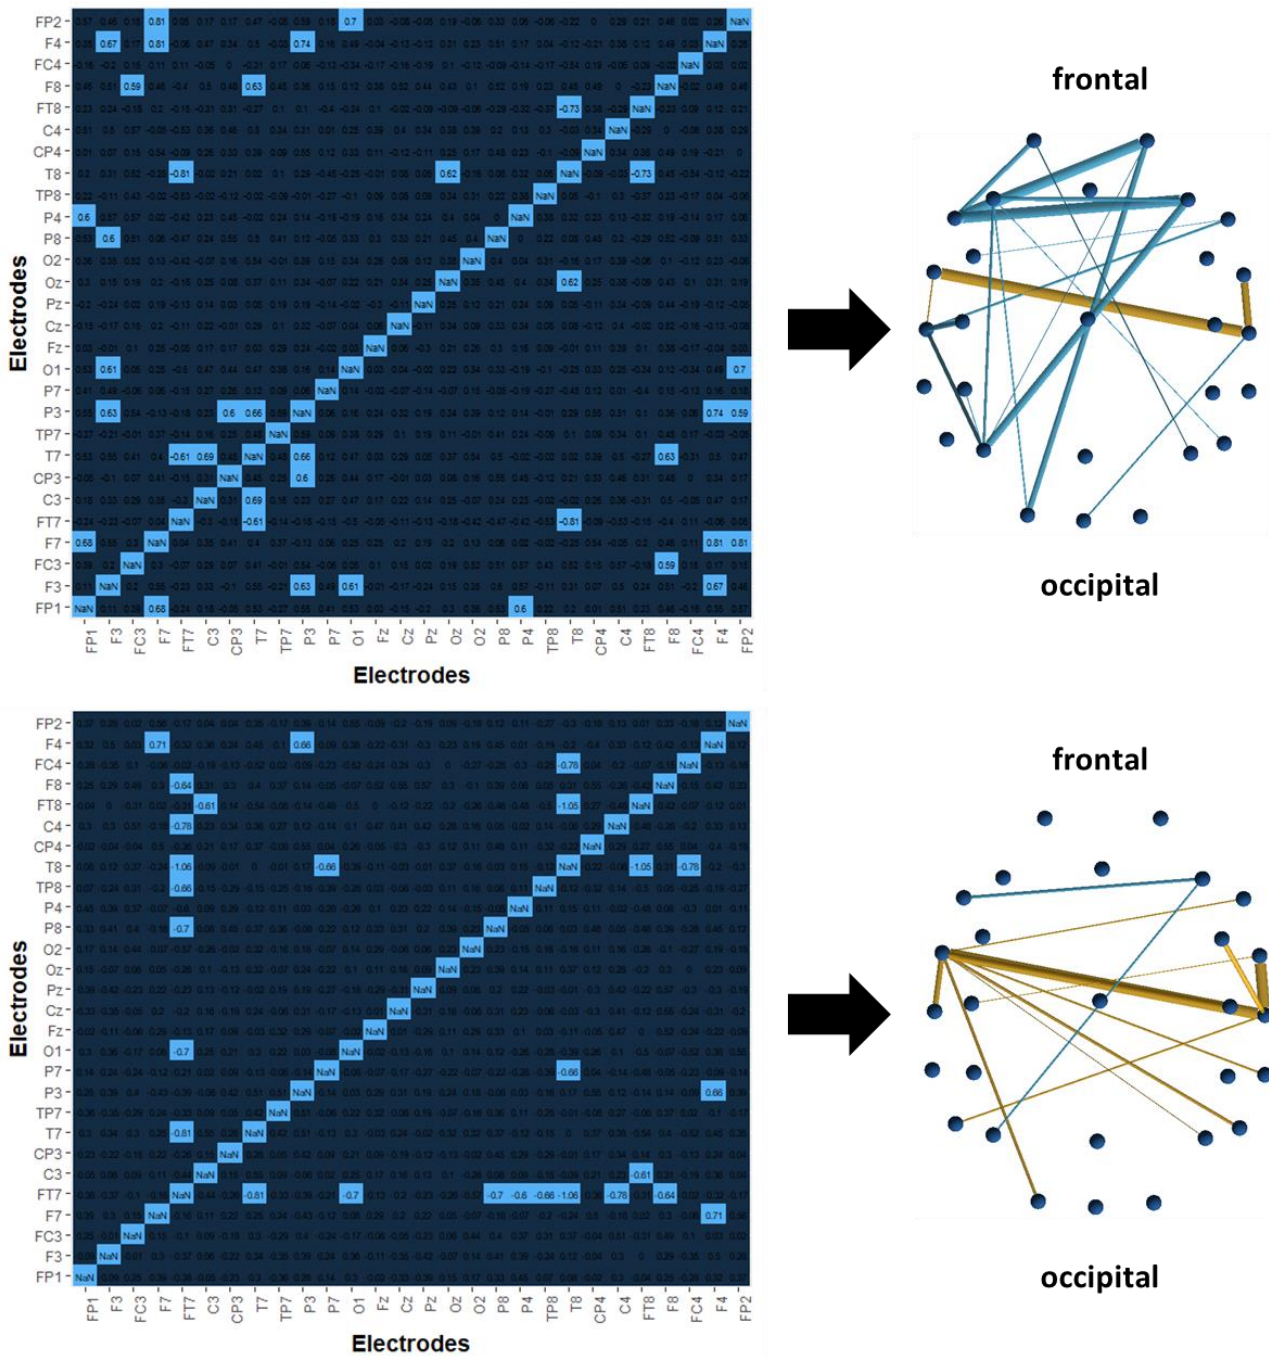

646

647

648 **List of abbreviations**

- 649 EEG electroencephalography
- 650 (w)PLI (weighted) Phase Lag Index
- 651 AP absolute pitch

|     |            |                                                |
|-----|------------|------------------------------------------------|
| 652 | RP         | relative pitch                                 |
| 653 | ASD        | Autism Spectrum Disorder or Condition          |
| 654 | PIS        | Pitch identification Screening                 |
| 655 | SPM        | Standard Progressive Matrices                  |
| 656 | ZVT        | “Zahlenverbindungstest” (~Trail Making Test)   |
| 657 | AMMA       | Advanced Measures of Music Audiation           |
| 658 | (GOLD-)MSI | Musical-Sophistication Index                   |
| 659 | PAT        | Pitch adjustment test                          |
| 660 | MAD        | Mean absolute derivation from target tone      |
| 661 | SDfoM      | Standard deviation from own mean               |
| 662 | AQ         | Autism-Quotient                                |
| 663 | EO         | eyes open resting state                        |
| 664 | EC         | eyes closed resting state                      |
| 665 | ICA        | independent component analysis                 |
| 666 | PC         | phase coherence                                |
| 667 | sgn        | sign                                           |
| 668 | imag       | imaginary component                            |
| 669 | $S_{xyt}$  | cross-spectrum                                 |
| 670 | MST        | minimum spanning tree                          |
| 671 | $\sigma$   | Small-Worldness                                |
| 672 | C          | Clustering Coefficient                         |
| 673 | $\gamma$   | Clustering relative to random network of same  |
| 674 |            | cost and density distribution                  |
| 675 | L          | Path length                                    |
| 676 | $\lambda$  | Path length relative to random network of same |
| 677 |            | cost and density distribution                  |

678 **Declarations**

679 **Ethics approval and consent to participate:** the study was approved by the ethic committee of the  
680 Hanover Medical School (Approval no. 7372, committee's reference number: DE 9515). All  
681 participants gave written consent.

682 **Consent for publication:** not applicable

683 **Availability of data and material:** The datasets generated and/ or analysed during the current  
684 study are not publicly available due to specifications on data availability within ethics approval.  
685 Data are however available from the corresponding author upon reasonable request and with  
686 permission of the ethics committee of the Hanover Medical School.

687 **Competing interests:** SBC is chief editor of "Molecular Autism". The authors declare that they  
688 have no competing interests.

689 **Funding:** TW receives a PhD scholarship from the German National Academic Foundation; TW  
690 declares that the funding body has no influence on design of the study and collection, analysis or  
691 interpretation of data and in writing the manuscript.

692 **Authors' contributions:** TW designed the study, collected, analysed and interpreted the data. RB  
693 made intensive contributions to preprocessing of EEG data, analysis of network parameters and  
694 single connection differences as well as provided further ideas on data analysis and interpretation.  
695 SBC contributed to the interpretation of the results and improvement of the manuscript. EA  
696 contributed to the design of the study and interpretation of the data. All authors read, improved and  
697 approved the final manuscript.

698 **Acknowledgements:** Hannes Schmidt, Pablo Carra, Artur Ehle, Fynn Lautenschläger, Michael  
699 Großbach, Christos Ioannou. SBC and RB were supported by the Autism Research Trust and the  
700 MRC during the period of this work.

701

702

703

## 704 **References**

705

706 1. Baron-Cohen S, Wheelwright S, Burtenshaw A, Hobson E. Mathematical Talent is Linked to  
707 Autism. *Hum Nat.* 2007;18:125–31.

708 2. Mitchell P, Ropar D. Visuo-spatial abilities in autism: A review. *Infant Child Dev.* 2004;13:185–  
709 98.

710 3. Heaton P, Hermelin B, Pring L. Autism and Pitch Processing: A Precursor for Savant Musical  
711 Ability? *Music Percept Interdiscip J.* 1998;15:291–305.

712 4. Howlin P, Goode S, Hutton J, Rutter M. Savant skills in autism: psychometric approaches and  
713 parental reports. *Philos Trans R Soc B Biol Sci.* 2009;364:1359–67.

714 5. Bor D, Billington J, Baron-Cohen S. Savant Memory for Digits in a Case of Synaesthesia and  
715 Asperger Syndrome is Related to Hyperactivity in the Lateral Prefrontal Cortex. *Neurocase.*  
716 2008;13:311–9.

717 6. Stevens DE, Moffitt TE. Neuropsychological profile of an asperger's syndrome case with  
718 exceptional calculating ability. *Clin Neuropsychol.* 1988;2:228–38.

719 7. Bouvet L, Donnadiou S, Valdois S, Caron C, Dawson M, Mottron L. Veridical mapping in savant  
720 abilities, absolute pitch, and synesthesia: an autism case study. *Front Psychol.* 2014;5.  
721 doi:10.3389/fpsyg.2014.00106.

722 8. Mottron Sylvie Belleville Emmanuel L. Atypical Memory Performance in an Autistic Savant.  
723 *Memory.* 1998;6:593–607.

724 9. O'Connor N, Hermelin B. The memory structure of autistic idiot-savant mnemonists. *Br J*  
725 *Psychol.* 1989;80:97–111.

726 10. Lai M-C, Lombardo MV, Chakrabarti B, Baron-Cohen S. Subgrouping the Autism “Spectrum”:  
727 Reflections on DSM-5. *PLoS Biol.* 2013;11:e1001544.

728 11. Takeuchi AH, Hulse SH. Absolute pitch. *Psychol Bull.* 1993;113:345–61.

729 12. Gregersen PK, Kowalsky E, Kohn N, Marvin EW. Early childhood music education and  
730 predisposition to absolute pitch: Teasing apart genes and environment. *Am J Med Genet.*  
731 2001;98:280–2.

732 13. Gregersen PK, Kowalsky E, Kohn N, Marvin EW. Absolute Pitch: Prevalence, Ethnic  
733 Variation, and Estimation of the Genetic Component. *Am J Hum Genet.* 1999;65:911–3.

734 14. Deutsch D, Henthorn T, Marvin E, Xu H. Absolute pitch among American and Chinese  
735 conservatory students: Prevalence differences, and evidence for a speech-related critical perioda). *J*  
736 *Acoust Soc Am.* 2006;119:719–22.

737 15. Profita J, Bidder TG, Optiz JM, Reynolds JF. Perfect pitch. *Am J Med Genet.* 1988;29:763–71.

738 16. Zatorre RJ. Absolute pitch: a model for understanding the influence of genes and development  
739 on neural and cognitive function. *Nat Neurosci.* 2003;6:692–5.



- 740 17. Baharloo S, Johnston PA, Service SK, Gitschier J, Freimer NB. Absolute Pitch: An Approach  
741 for Identification of Genetic and Nongenetic Components. *Am J Hum Genet.* 1998;62:224–31.
- 742 18. Athos EA, Levinson B, Kistler A, Zemansky J, Bostrom A, Freimer N, et al. Dichotomy and  
743 perceptual distortions in absolute pitch ability. *Proc Natl Acad Sci.* 2007;104:14795–800.
- 744 19. Deutsch D, Dooley K, Henthorn T, Head B. Absolute pitch among students in an American  
745 music conservatory: Association with tone language fluency. *J Acoust Soc Am.* 2009;125:2398–  
746 403.
- 747 20. Gregersen PK, Kowalsky E, Lee A, Baron-Cohen S, Fisher SE, Asher JE, et al. Absolute pitch  
748 exhibits phenotypic and genetic overlap with synesthesia. *Hum Mol Genet.* 2013;22:2097–104.
- 749 21. Brenton JN, Devries SP, Barton C, Minnich H, Sokol DK. Absolute Pitch in a Four-Year-Old  
750 Boy With Autism. *Pediatr Neurol.* 2008;39:137–8.
- 751 22. Heaton P, Davis RE, Happé FGE. Research note: Exceptional absolute pitch perception for  
752 spoken words in an able adult with autism. *Neuropsychologia.* 2008;46:2095–8.
- 753 23. Bonnel A, Mottron L, Peretz I, Trudel M, Gallun E, Bonnel AM. Enhanced Pitch Sensitivity in  
754 Individuals with Autism: A Signal Detection Analysis. *J Cogn Neurosci.* 2003;15:226–35.
- 755 24. DePape A-MR, Hall GBC, Tillmann B, Trainor LJ. Auditory Processing in High-Functioning  
756 Adolescents with Autism Spectrum Disorder. *PLoS ONE.* 2012;7:e44084.
- 757 25. Heaton P, Hudry K, Ludlow A, Hill E. Superior discrimination of speech pitch and its  
758 relationship to verbal ability in autism spectrum disorders. *Cogn Neuropsychol.* 2008;25.
- 759 26. Lenhoff HM, Perales O, Hickok G. Absolute Pitch in Williams Syndrome. *Music Percept.*  
760 2001;18:491–503.
- 761 27. Bailey A, Le Couteur A, Gottesman I, Bolton P, Simonoff E, Yuzda E, et al. Autism as a  
762 strongly genetic disorder: evidence from a British twin study. *Psychol Med.* 1995;25:63.
- 763 28. Bill BR, Geschwind DH. Genetic advances in autism: heterogeneity and convergence on shared  
764 pathways. *Curr Opin Genet Dev.* 2009;19:271–8.
- 765 29. Constantino JN, Zhang Y, Frazier T, Abbacchi AM, Law P. Sibling Recurrence and the Genetic  
766 Epidemiology of Autism. *Am J Psychiatry.* 2010;167:1349–56.
- 767 30. Geschwind DH. Genetics of autism spectrum disorders. *Trends Cogn Sci.* 2011;15:409–16.
- 768 31. Persico AM, Napolioni V. Autism genetics. *Behav Brain Res.* 2013;251:95–112.
- 769 32. Bellugi U, Lichtenberger L, Mills D, Galaburda A, Korenberg JR. Bridging cognition, the brain  
770 and molecular genetics: evidence from Williams syndrome. *Trends Neurosci.* 1999;22:197–207.
- 771 33. Donnai D, Karmiloff-Smith A. Williams syndrome: From genotype through to the cognitive  
772 phenotype. *Am J Med Genet.* 2000;97:164–71.
- 773 34. Meyer-Lindenberg A, Mervis CB, Berman KF. Neural mechanisms in Williams syndrome: a  
774 unique window to genetic influences on cognition and behaviour. *Nat Rev Neurosci.* 2006;7:380–  
775 93.

- 776 35. Chin CS. The Development of Absolute Pitch: A Theory Concerning the Roles of Music  
777 Training at an Early Developmental Age and Individual Cognitive Style. *Psychol Music*.  
778 2003;31:155–71.
- 779 36. Loui P, Li HC, Hohmann A, Schlaug G. Enhanced Cortical Connectivity in Absolute Pitch  
780 Musicians: A Model for Local Hyperconnectivity. *J Cogn Neurosci*. 2011;23:1015–26.
- 781 37. Schellenberg EG, Trehub SE. Good Pitch Memory Is Widespread. *Psychol Sci*. 2003;14:262–6.
- 782 38. Russo FA, Windell DL, Cuddy LL. Learning the “Special Note”: Evidence for a Critical Period  
783 for Absolute Pitch Acquisition. *Music Percept*. 2003;21:119–27.
- 784 39. Dohn A, Garza-Villarreal EA, Heaton P, Vuust P. Do musicians with perfect pitch have more  
785 autism traits than musicians without perfect pitch? An empirical study. *PLoS One*. 2012;7.
- 786 40. Brown WA, Cammuso K, Sachs H, Winklosky B, Mullane J, Bernier R, et al. Autism-Related  
787 Language, Personality, and Cognition in People with Absolute Pitch: Results of a Preliminary  
788 Study. *J Autism Dev Disord*. 2003;33:163–7.
- 789 41. Jäncke L, Langer N, Hänggi J. Diminished Whole-brain but Enhanced Peri-sylvian Connectivity  
790 in Absolute Pitch Musicians. *J Cogn Neurosci*. 2012;24:1447–61.
- 791 42. Courchesne E, Pierce K. Why the frontal cortex in autism might be talking only to itself: local  
792 over-connectivity but long-distance disconnection. *Curr Opin Neurobiol*. 2005;15:225–30.
- 793 43. Loui P, Zamm A, Schlaug G. Enhanced functional networks in absolute pitch. *NeuroImage*.  
794 2012;63:632–40.
- 795 44. Belmonte MK. Autism and Abnormal Development of Brain Connectivity. *J Neurosci*.  
796 2004;24:9228–31.
- 797 45. Just MA, Cherkassky VL, Keller TA, Kana RK, Minshew NJ. Functional and Anatomical  
798 Cortical Underconnectivity in Autism: Evidence from an fMRI Study of an Executive Function  
799 Task and Corpus Callosum Morphometry. *Cereb Cortex*. 2006;17:951–61.
- 800 46. Cherkassky VL, Kana RK, Keller TA, Just MA. Functional connectivity in a baseline resting-  
801 state network in autism: *NeuroReport*. 2006;17:1687–90.
- 802 47. Keown CL, Shih P, Nair A, Peterson N, Mulvey ME, Müller R-A. Local Functional  
803 Overconnectivity in Posterior Brain Regions Is Associated with Symptom Severity in Autism  
804 Spectrum Disorders. *Cell Rep*. 2013;5:567–72.
- 805 48. Lewis JD, Theilmann RJ, Fonov V, Bellec P, Lincoln A, Evans AC, et al. Callosal fiber length  
806 and interhemispheric connectivity in adults with autism: Brain overgrowth and underconnectivity.  
807 *Hum Brain Mapp*. 2013;34:1685–95.
- 808 49. Murias M, Webb SJ, Greenson J, Dawson G. Resting State Cortical Connectivity Reflected in  
809 EEG Coherence in Individuals With Autism. *Biol Psychiatry*. 2007;62:270–3.
- 810 50. Amaral DG, Schumann CM, Nordahl CW. Neuroanatomy of autism. *Trends Neurosci*.  
811 2008;31:137–45.

- 812 51. Mottron L, Dawson M, Soulières I, Hubert B, Burack J. Enhanced Perceptual Functioning in  
813 Autism: An Update, and Eight Principles of Autistic Perception. *J Autism Dev Disord.* 2006;36:27–  
814 43.
- 815 52. Mottron L, Dawson M, Soulières I. Enhanced perception in savant syndrome: patterns, structure  
816 and creativity. *Philos Trans R Soc B Biol Sci.* 2009;364:1385–91.
- 817 53. Baron-Cohen S. Two new theories of autism: hyper-systemising and assortative mating. *Arch*  
818 *Dis Child.* 2005;91:2–5.
- 819 54. Bargary G, Mitchell KJ. Synaesthesia and cortical connectivity. *Trends Neurosci.* 2008;31:335–  
820 342.
- 821 55. Hänggi J, Wotruba D, Jäncke L. Globally altered structural brain network topology in  
822 grapheme-color synesthesia. *J Neurosci Off J Soc Neurosci.* 2011;31:5816–5828.
- 823 56. Loui P, Zamm A, Schlaug G. Absolute Pitch and Synesthesia: Two Sides of the Same Coin?  
824 Shared and Distinct Neural Substrates of Music Listening. *ICMPC Proc Ed Catherine Stevens AI*  
825 *Int Conf Music Percept Cogn.* 2012;:618–23.
- 826 57. Rouw R, Scholte HS, Colizoli O. Brain areas involved in synaesthesia: A review. *J*  
827 *Neuropsychol.* 2011;5:214–42.
- 828 58. Volberg G, Karmann A, Birkner S, Greenlee MW. Short- and long-range neural synchrony in  
829 grapheme-color synesthesia. *J Cogn Neurosci.* 2013;25:1148–62.
- 830 59. Zamm A, Schlaug G, Eagleman DM, Loui P. Pathways to seeing music: Enhanced structural  
831 connectivity in colored-music synesthesia. *NeuroImage.* 2013;74:359–366.
- 832 60. Supekar K, Uddin LQ, Khouzam A, Phillips J, Gaillard WD, Kenworthy LE, et al. Brain  
833 Hyperconnectivity in Children with Autism and its Links to Social Deficits. *Cell Rep.* 2013;5:738–  
834 47.
- 835 61. Mottron L, Bouvet L, Bonnel A, Samson F, Burack JA, Dawson M, et al. Veridical mapping in  
836 the development of exceptional autistic abilities. *Neurosci Biobehav Rev.* 2012;37.
- 837 62. Bullmore E, Sporns O. Complex brain networks: graph theoretical analysis of structural and  
838 functional systems. *Nat Rev Neurosci.* 2009;10:186–198.
- 839 63. Sporns O. *Networks of the Brain.* Cambridge, Massachusetts; London, England: MIT Press;  
840 2011.
- 841 64. Oldfield RC. The assessment and analysis of handedness: The Edinburgh inventory.  
842 *Neuropsychologia.* 1971;9:97–113.
- 843 65. Raven J, Raven JC, Court JH. *Manual for Raven’s Progressive Matrices and Vocabulary Tests.*  
844 *Section 3: Standard Progressive Matrices: 2000 Edition, updated 2004.* San Antonio: Pearson  
845 Assessment; 2004.
- 846 66. Oswald WD. *Zahlen-Verbindungs-Test (ZVT) - 3., überarbeitete und neu normierte Auflage.* 3rd  
847 edition. Göttingen: Hogrefe; 2016.
- 848 67. Gordon EE. *Manual for the advanced measures of music audiation.* GIA Publications; 1989.

- 849 68. Müllensiefen D, Gingras B, Musil J, Stewart L. The Musicality of Non-Musicians: An Index for  
850 Assessing Musical Sophistication in the General Population. *PLOS ONE*. 2014;9:e89642.
- 851 69. Dohn A, Garza-Villarreal EA, Ribe LR, Wallentin M, Vuust P. Musical Activity Tunes Up  
852 Absolute Pitch Ability. *Music Percept Interdiscip J*. 2014;31:359–71.
- 853 70. Baron-Cohen S, Wheelwright S, Skinner R, Martin J, Clubley E. The Autism-Spectrum  
854 Quotient (AQ): Evidence from Asperger Syndrome/High-Functioning Autism, Males and Females,  
855 Scientists and Mathematicians. *J Autism Dev Disord*. 2001;31:5–17.
- 856 71. Peirce JW. PsychoPy—Psychophysics software in Python. *J Neurosci Methods*. 2007;162:8–13.
- 857 72. Delorme A, Makeig S. EEGLAB: an open source toolbox for analysis of single-trial EEG  
858 dynamics including independent component analysis. *J Neurosci Methods*. 2004;134:9–21.
- 859 73. Oostenveld R, Fries P, Maris E, Schoffelen J-M. FieldTrip: Open Source Software for  
860 Advanced Analysis of MEG, EEG, and Invasive Electrophysiological Data. *Comput Intell*  
861 *Neurosci*. 2011;2011:1–9.
- 862 74. Perrin F, Pernier J, Bertrand O, Echallier JF. Spherical splines for scalp potential and current  
863 density mapping. *Electroencephalogr Clin Neurophysiol*. 1989;72:184–7.
- 864 75. Vinck M, Battaglia FP, Womelsdorf T, Pennartz C. Improved measures of phase-coupling  
865 between spikes and the Local Field Potential. *J Comput Neurosci*. 2012;33:53–75.
- 866 76. Plonsey R, Heppner DB. Considerations of quasi-stationarity in electrophysiological systems.  
867 *Bull Math Biophys*. 1967;29:657–64.
- 868 77. Stinstra JG, Peters MJ. The volume conductor may act as a temporal filter on the ECG and  
869 EEG. *Med Biol Eng Comput*. 1998;36:711–6.
- 870 78. Nunez PL, Srinivasan R, Westdorp AF, Wijesinghe RS, Tucker DM, Silberstein RB, et al. EEG  
871 coherency. *Electroencephalogr Clin Neurophysiol*. 1997;103:499–515.
- 872 79. Stam CJ, Nolte G, Daffertshofer A. Phase lag index: Assessment of functional connectivity  
873 from multi channel EEG and MEG with diminished bias from common sources. *Hum Brain Mapp*.  
874 2007;28:1178–93.
- 875 80. Cohen MX. *Analyzing Neural Time Series Data. Theory and Practice*. Cambridge,  
876 Massachusetts; London, England: MIT Press; 2014.
- 877 81. Mormann F, Lehnertz K, David P, Elger C. Mean phase coherence as a measure for phase  
878 synchronization and its application to the EEG of epilepsy patients. *Phys Nonlinear Phenom*.  
879 2000;144:358–69.
- 880 82. Stam C, Jones B, Nolte G, Breakspear M, Scheltens P. Small-World Networks and Functional  
881 Connectivity in Alzheimer’s Disease. *Cereb Cortex*. 2006;17:92–9.
- 882 83. Ortiz E, Stingl K, Münßinger J, Braun C, Preissl H, Belardinelli P. Weighted Phase Lag Index  
883 and Graph Analysis: Preliminary Investigation of Functional Connectivity during Resting State in  
884 Children. *Comput Math Methods Med*. 2012;2012:1–8.

- 885 84. Hardmeier M, Hatz F, Bousleiman H, Schindler C, Stam CJ, Fuhr P. Reproducibility of  
886 Functional Connectivity and Graph Measures Based on the Phase Lag Index (PLI) and Weighted  
887 Phase Lag Index (wPLI) Derived from High Resolution EEG. *PLoS ONE*. 2014;9:e108648.
- 888 85. Rubinov M, Sporns O. Complex network measures of brain connectivity: uses and  
889 interpretations. *NeuroImage*. 2010;52:1059–69.
- 890 86. Langer N, Pedroni A, Gianotti LRR, Hänggi J, Knoch D, Jäncke L. Functional brain network  
891 efficiency predicts intelligence. *Hum Brain Mapp*. 2012;33:1393–406.
- 892 87. de Haan W, Pijnenburg YA, Strijers RL, van der Made Y, van der Flier WM, Scheltens P, et al.  
893 Functional neural network analysis in frontotemporal dementia and Alzheimer’s disease using EEG  
894 and graph theory. *BMC Neurosci*. 2009;10:101.
- 895 88. Iturria-Medina Y, Sotero RC, Canales-Rodríguez EJ, Alemán-Gómez Y, Melie-García L.  
896 Studying the human brain anatomical network via diffusion-weighted MRI and Graph Theory.  
897 *NeuroImage*. 2008;40:1064–76.
- 898 89. Iturria-Medina Y, Canales-Rodríguez EJ, Melie-García L, Valdés-Hernández PA, Martínez-  
899 Montes E, Alemán-Gómez Y, et al. Characterizing brain anatomical connections using diffusion  
900 weighted MRI and graph theory. *NeuroImage*. 2007;36:645–60.
- 901 90. Zhou Y, Yu F, Duong T. Multiparametric MRI Characterization and Prediction in Autism  
902 Spectrum Disorder Using Graph Theory and Machine Learning. *PLoS ONE*. 2014;9:e90405.
- 903 91. van Wijk, Bernadette C. M., Stam CJ, Daffertshofer A, Sporns O. Comparing Brain Networks  
904 of Different Size and Connectivity Density Using Graph Theory. *PloS One*. 2010;5:e13701.
- 905 92. Stam CJ, Reijneveld JC. Graph theoretical analysis of complex networks in the brain. *Nonlinear*  
906 *Biomed Phys*. 2007;1:3.
- 907 93. Sporns O, Zwi JD. The Small World of the Cerebral Cortex. *Neuroinformatics*. 2004;2:145–62.
- 908 94. van Straaten, E. C. W., Stam CJ. Structure out of chaos: functional brain network analysis with  
909 EEG, MEG, and functional MRI. *Eur Neuropsychopharmacol J Eur Coll Neuropsychopharmacol*.  
910 2013;23:7–18.
- 911 95. Latora V, Marchiori M. Efficient Behavior of Small-World Networks. *Phys Rev Lett*. 2001;87.  
912 doi:10.1103/PhysRevLett.87.198701.
- 913 96. Cohen JR, D’Esposito M. The Segregation and Integration of Distinct Brain Networks and  
914 Their Relationship to Cognition. *J Neurosci*. 2016;36:12083–94.
- 915 97. Watts DJ, Strogatz SH. Collective dynamics of “small-world” networks. *Nature*. 1998;441–2.
- 916 98. Bullmore E, Sporns O. The economy of brain network organization. *Nat Rev Neurosci*.  
917 2012;13:336–349.
- 918 99. Achard S, Bullmore E. Efficiency and cost of economical brain functional networks. *PLoS*  
919 *Comput Biol*. 2007;3:e17.
- 920 100. Senkowski D, Schneider TR, Foxe JJ, Engel AK. Crossmodal binding through neural  
921 coherence: implications for multisensory processing. *Trends Neurosci*. 2008;31:401–9.

- 922 101. Xia M, Wang J, He Y. BrainNet Viewer: A Network Visualization Tool for Human Brain  
923 Connectomics. *PLoS ONE*. 2013;8:e68910.
- 924 102. Koessler L, Maillard L, Benhadid A, Vignal JP, Felblinger J, Vespignani H, et al. Automated  
925 cortical projection of EEG sensors: Anatomical correlation via the international 10–10 system.  
926 *NeuroImage*. 2009;46:64–72.
- 927 103. Peters JM, Taquet M, Vega C, Jeste SS, Fernández IS, Tan J, et al. Brain functional networks  
928 in syndromic and non-syndromic autism: a graph theoretical study of EEG connectivity. *BMC Med*.  
929 2013;11. doi:10.1186/1741-7015-11-54.
- 930 104. Cantero JL, Atienza M, Madsen JR, Stickgold R. Gamma EEG dynamics in neocortex and  
931 hippocampus during human wakefulness and sleep. *NeuroImage*. 2004;22:1271–80.
- 932 105. Bragin A, Jando G, Nadasdy Z, Hetke J, Wise K, Buzsaki G. Gamma (40-100 Hz) oscillation  
933 in the hippocampus of the behaving rat. *J Neurosci*. 1995;15:47–60.
- 934 106. Miltner WHR, Braun C, Arnold M, Witte H, Taub E. Coherence of gamma-band EEG activity  
935 as a basis for associative learning. *Nature*. 1999;397:434–6.
- 936 107. Herrmann CS, Fründ I, Lenz D. Human gamma-band activity: A review on cognitive and  
937 behavioral correlates and network models. *Neurosci Biobehav Rev*. 2010;34:981–92.
- 938 108. Elmer S, Rogenmoser L, Kühnis J, Jäncke L. Bridging the Gap between Perceptual and  
939 Cognitive Perspectives on Absolute Pitch. *J Neurosci*. 2015;35:366–71.
- 940 109. Zatorre RJ, Beckett C. Multiple coding strategies in the retention of musical tones by  
941 possessors of absolute pitch. *Mem Cognit*. 1989;17:582–9.
- 942 110. Schulze K, Gaab N, Schlaug G. Perceiving pitch absolutely: Comparing absolute and relative  
943 pitch possessors in a pitch memory task. *BMC Neurosci*. 2009;10:106.
- 944 111. Levitin DJ. Absolute memory for musical pitch: Evidence from the production of learned  
945 melodies. *Percept Psychophys*. 1994;56:414–23.
- 946 112. Bermudez P, Zatorre RJ. The absolute pitch mind continues to reveal itself. *J Biol*. 2009;8:75.
- 947 113. Bhattacharya J, Petsche H, Pereda E. Long-Range Synchrony in the Gamma Band: Role in  
948 Music Perception. *J Neurosci*. 2001;21:6329–6337.
- 949 114. Bhattacharya J, Petsche H. Musicians and the gamma band: A secret affair? *NeuroReport*.  
950 2001;12:371–374.
- 951 115. Sun L, Grutzner C, Bolte S, Wibrall M, Tozman T, Schlitt S, et al. Impaired Gamma-Band  
952 Activity during Perceptual Organization in Adults with Autism Spectrum Disorders: Evidence for  
953 Dysfunctional Network Activity in Frontal-Posterior Cortices. *J Neurosci*. 2012;32:9563–73.
- 954 116. Brown C, Gruber T, Boucher J, Rippon G, Brock J. Gamma Abnormalities During Perception  
955 of Illusory Figures in Autism. *Cortex*. 2005;41:364–76.
- 956 117. Herrmann C, Demiralp T. Human EEG gamma oscillations in neuropsychiatric disorders. *Clin*  
957 *Neurophysiol*. 2005;116:2719–33.
- 958 118. Uhlhaas PJ, Singer W. Neural synchrony in brain disorders: relevance for cognitive  
959 dysfunctions and pathophysiology. *Neuron*. 2006;52:155–68.

- 960 119. Brock J, Brown CC, Boucher J, Rippon G. The temporal binding deficit hypothesis of autism.  
961 *Dev Psychopathol.* 2002;14. doi:10.1017/S0954579402002018.
- 962 120. Grice SJ, Spratling MW, Karmiloff-Smith A, Halit H, Csibra G, de Haan M, et al. Disordered  
963 visual processing and oscillatory brain activity in autism and Williams Syndrome. *NeuroReport.*  
964 2001;12:2697.
- 965 121. Brosnan MJ, Scott FJ, Fox S, Pye J. Gestalt processing in autism: failure to process perceptual  
966 relationships and the implications for contextual understanding. *J Child Psychol Psychiatry.*  
967 2004;45:459–69.
- 968 122. Happé F, Frith U. The weak coherence account: detail-focused cognitive style in autism  
969 spectrum disorders. *J Autism Dev Disord.* 2006;36.
- 970 123. Dawson G, Webb S, Schellenberg GD, Dager S, Friedman S, Aylward E, et al. Defining the  
971 broader phenotype of autism: Genetic, brain, and behavioral perspectives. *Dev Psychopathol.*  
972 2002;14. doi:10.1017/S0954579402003103.
- 973 124. Samson F, Mottron L, Soulières I, Zeffiro TA. Enhanced visual functioning in autism: an ALE  
974 meta-analysis. *Hum Brain Mapp.* 2012;33.
- 975 125. Happé F. Autism: cognitive deficit or cognitive style? *Trends Cogn Sci.* 1999;3.
- 976 126. Happé F, Frith U. The neuropsychology of autism. *Brain.* 1996;119.
- 977 127. Frith U. *Autism: Explaining the Enigma.* Oxford, UK: Blackwell; 1989.
- 978 128. Costa-Giomi E, Gilmour R, Siddell J, Lefebvre E. Absolute Pitch, Early Musical Instruction,  
979 and Spatial Abilities. *Ann N Y Acad Sci.* 2006;930:394–6.
- 980 129. Gervain J, Vines BW, Chen LM, Seo RJ, Hensch TK, Werker JF, et al. Valproate reopens  
981 critical-period learning of absolute pitch. *Front Syst Neurosci.* 2013;7.  
982 doi:10.3389/fnsys.2013.00102.
- 983 130. Christensen J, Grønberg TK, Sørensen MJ, Schendel D, Parner ET, Pedersen LH, et al.  
984 Prenatal Valproate Exposure and Risk of Autism Spectrum Disorders and Childhood Autism.  
985 *JAMA.* 2013;309:1696.
- 986 131. Williams G, King J, Cunningham M, Stephan M, Kerr B, Hersh JH. Fetal valproate syndrome  
987 and autism: additional evidence of an association. *Dev Med Child Neurol.* 2001;43:202–6.
- 988 132. Dufour-Rainfray D, Vourc'h P, Le Guisquet A-M, Garreau L, Ternant D, Bodard S, et al.  
989 Behavior and serotonergic disorders in rats exposed prenatally to valproate: A model for autism.  
990 *Neurosci Lett.* 2010;470:55–9.
- 991 133. Wagner GC, Reuhl KR, Cheh M, McRae P, Halladay AK. A New Neurobehavioral Model of  
992 Autism in Mice: Pre- and Postnatal Exposure to Sodium Valproate. *J Autism Dev Disord.*  
993 2006;36:779–93.
- 994 134. Moseley RL, Ypma RJF, Holt RJ, Floris D, Chura LR, Spencer MD, et al. Whole-brain  
995 functional hypoconnectivity as an endophenotype of autism in adolescents. *NeuroImage Clin.*  
996 2015;9:140–52.

- 997 135. Pellicano E, Gibson L, Maybery M, Durkin K, Badcock DR. Abnormal global processing  
998 along the dorsal visual pathway in autism: a possible mechanism for weak visuospatial coherence?  
999 *Neuropsychologia*. 2005;43:1044–53.
- 1000 136. Lo Y-C, Soong W-T, Gau SS-F, Wu Y-Y, Lai M-C, Yeh F-C, et al. The loss of asymmetry and  
1001 reduced interhemispheric connectivity in adolescents with autism: A study using diffusion spectrum  
1002 imaging tractography. *Psychiatry Res Neuroimaging*. 2011;192:60–6.
- 1003 137. Dohn A, Garza-Villarreal EA, Chakravarty MM, Hansen M, Lerch JP, Vuust P. Gray- and  
1004 White-Matter Anatomy of Absolute Pitch Possessors. *Cereb Cortex*. 2015;25:1379–88.
- 1005 138. Tsiaras V, Simos PG, Rezaie R, Sheth BR, Garyfallidis E, Castillo EM, et al. Extracting  
1006 biomarkers of autism from MEG resting-state functional connectivity networks. *Comput Biol Med*.  
1007 2011;41:1166–77.
- 1008 139. Sihvonen AJ, Ripollés P, Särkämö T, Leo V, Rodríguez-Fornells A, Saunavaara J, et al.  
1009 Tracting the neural basis of music: Deficient structural connectivity underlying acquired amusia.  
1010 *Cortex*. 2017;97:255–73.
- 1011 140. Sihvonen AJ, Ripolles P, Leo V, Rodríguez-Fornells A, Soinila S, Sarkamo T. Neural Basis of  
1012 Acquired Amusia and Its Recovery after Stroke. *J Neurosci*. 2016;36:8872–81.
- 1013 141. Schlaug G, Jäncke L, Huang Y, Staiger JF, Steinmetz H. Increased corpus callosum size in  
1014 musicians. *Neuropsychol Dev Stud Corpus Callosum*. 1995;33:1047–55.
- 1015 142. Bengtsson SL, Nagy Z, Skare S, Forsman L, Forssberg H, Ullén F. Extensive piano practicing  
1016 has regionally specific effects on white matter development. *Nat Neurosci*. 2005;8:1148–50.
- 1017 143. Burunat I, Brattico E, Puoliväli T, Ristaniemi T, Sams M, Toiviainen P. Action in Perception:  
1018 Prominent Visuo-Motor Functional Symmetry in Musicians during Music Listening. *PLOS ONE*.  
1019 2015;10:e0138238.
- 1020 144. Schmithorst VJ, Wilke M. Differences in white matter architecture between musicians and  
1021 non-musicians: a diffusion tensor imaging study. *Neurosci Lett*. 2002;321:57–60.
- 1022 145. Elmer S, Hänggi J, Jäncke L. Interhemispheric transcallosal connectivity between the left and  
1023 right planum temporale predicts musicianship, performance in temporal speech processing, and  
1024 functional specialization. *Brain Struct Funct*. 2014.
- 1025 146. Sihvonen AJ, Särkämö T, Ripollés P, Leo V, Saunavaara J, Parkkola R, et al. Functional  
1026 neural changes associated with acquired amusia across different stages of recovery after stroke. *Sci*  
1027 *Rep*. 2017;7:11390.
- 1028 147. Sota S, Hatada S, Honjyo K, Takatsuka T, Honer WG, Morinobu S, et al. Musical disability in  
1029 children with autism spectrum disorder. *Psychiatry Res*. 2018;267:354–9.
- 1030 148. von Stein A, Sarnthein J. Different frequencies for different scales of cortical integration: from  
1031 local gamma to long range alpha/theta synchronization. *Int J Psychophysiol*. 2000;38:301–13.
- 1032 149. Wass S. Distortions and disconnections: disrupted brain connectivity in autism. *Brain Cogn*.  
1033 2011;75.
- 1034 150. Heaton P. Pitch memory, labelling and disembedding in autism. *J Child Psychol Psychiatry*.  
1035 2003;44:543–51.
